# Supplementary material
Source: PubMed Central journal article supplement (PMC4704207)
Supplement: AAC.01966-15_zac001164782so1.pdf [file AAC.01966-15_zac001164782so1.pdf]

# Supplemental Material

## **An all-D amphipathic undecapeptide shows promising activity against colistin-resistant strains of *Acinetobacter baumannii* and a dual mode of action**

Alberto Oddo,<sup>a#‡</sup> Thomas T. Thomsen,<sup>b‡</sup> Susanne Kjelstrup,<sup>b</sup> Ciara Gorey,<sup>a</sup> Henrik Franzyk,<sup>a</sup>  
Niels Frimodt-Møller,<sup>c</sup> Anders Løbner-Olesen,<sup>b#</sup> Paul R. Hansen<sup>a#</sup>

Department of Drug Design and Pharmacology , University of Copenhagen, Copenhagen, Denmark<sup>a</sup>; Dept. of Biology, Section for Functional Genomics and Center for Bacterial Stress Response (BASP), University of Copenhagen, Copenhagen, Denmark<sup>b</sup>; Department of Clinical Microbiology, Rigshospitalet, Copenhagen, Denmark<sup>c</sup>

#Address correspondence to Alberto Oddo, [alberto.oddo@sund.ku.dk](mailto:alberto.oddo@sund.ku.dk); Anders Løbner-Olesen, [lobner@bio.ku.dk](mailto:lobner@bio.ku.dk); Paul R. Hansen, [prh@sund.ku.dk](mailto:prh@sund.ku.dk)

‡These authors contributed equally to this work.

### **Content:**

**S2-S3: Peptide characterization data**

**S4: Reverse-phase HPLC Setup**

**S5-S13: Analytical chromatograms**

**S14-S24: MALDI-ToF-MS Setup and spectra**

**S25: Hemolysis determination protocol**

## Peptide characterization data

**BP100:** purity = 98.7%;  $t_R$  = 14.7 min; calculated  $m/z$  for  $C_{72}H_{126}N_{17}O_{12}$   $[M+H]^+$  = 1420.97;  
experimental  $m/z$  = 1420.72

**BP143:** purity = 95.5%;  $t_R$  = 15.0 min; calculated  $m/z$  for  $C_{72}H_{126}N_{17}O_{12}$   $[M+H]^+$  = 1420.97;  
experimental  $m/z$  = 1420.70

**BP157:** purity = 99.0%;  $t_R$  = 14.4 min; calculated  $m/z$  for  $C_{72}H_{126}N_{17}O_{12}$   $[M+H]^+$  = 1420.97;  
experimental  $m/z$  = 1420.58

**RW-BP100:** purity = 100%;  $t_R$  = 15.7 min; calculated  $m/z$  for  $C_{74}H_{127}N_{28}O_{11}$   $[M+H]^+$  =  
1584.02; experimental  $m/z$  = 1584.02

**BP201:** purity = 99.0%;  $t_R$  = 14.8 min; calculated  $m/z$  for  $C_{72}H_{126}N_{21}O_{12}$   $[M+H]^+$  = 1476.98;  
experimental  $m/z$  = 1476.59

**BP202:** purity = 99.0%;  $t_R$  = 14.8 min; calculated  $m/z$  for  $C_{72}H_{126}N_{21}O_{12}$   $[M+H]^+$  = 1476.98;  
experimental  $m/z$  = 1476.59

**BP203:** purity = 100%;  $t_R$  = 15.0 min; calculated  $m/z$  for  $C_{72}H_{126}N_{19}O_{12}$   $[M+H]^+$  = 1448.98;  
experimental  $m/z$  = 1448.76

**BP204:** purity = 99.9%;  $t_R$  = 14.7 min; calculated  $m/z$  for  $C_{72}H_{126}N_{23}O_{12}$   $[M+H]^+$  = 1504.99;  
experimental  $m/z$  = 1504.43

**BP205:** purity = 95.2%;  $t_R$  = 14.6 min; calculated  $m/z$  for  $C_{72}H_{126}N_{21}O_{12}$   $[M+H]^+$  = 1476.98;  
experimental  $m/z$  = 1476.86

**BP206:** purity = 98.5%;  $t_R$  = 15.0 min; calculated  $m/z$  for  $C_{72}H_{126}N_{21}O_{12}$   $[M+H]^+$  = 1476.98;  
experimental  $m/z$  = 1476.33

**BP207:** purity = 99.3%;  $t_R$  = 14.5 min; calculated  $m/z$  for  $C_{72}H_{126}N_{17}O_{12}$   $[M+H]^+$  = 1420.97;  
experimental  $m/z$  = 1420.46

**BP208:** purity = 98.4%;  $t_R$  = 14.2 min; calculated  $m/z$  for  $C_{72}H_{126}N_{17}O_{12}$   $[M+H]^+$  = 1420.97;  
experimental  $m/z$  = 1420.46

**BP209:** purity = 99.9%;  $t_R$  = 14.7 min; calculated  $m/z$  for  $C_{76}H_{128}N_{27}O_{12}$   $[M+H]^+$  = 1404.97;  
experimental  $m/z$  = 1404.55

**BP210:** purity = 95.1%;  $t_R$  = 15.7 min; calculated  $m/z$  for  $C_{76}H_{128}N_{27}O_{12}$   $[M+H]^+$  = 1611.02;  
experimental  $m/z$  = 1610.70

**BP211:** purity = 99.1%;  $t_R$  = 15.0 min; calculated  $m/z$  for  $C_{72}H_{126}N_{19}O_{12}$   $[M+H]^+$  = 1448.98;  
experimental  $m/z$  = 1448.51

**BP212:** purity = 100%;  $t_R$  = 15.7 min; calculated  $m/z$  for  $C_{76}H_{128}N_{17}O_{12}$   $[M+H]^+$  = 1470.99;  
experimental  $m/z$  = 1470.25

**BP213** purity = 96.3%;  $t_R$  = 14.4 min; calculated  $m/z$  for  $C_{72}H_{126}N_{19}O_{12}$   $[M+H]^+$  = 1448.98;  
experimental  $m/z$  = 1448.51

**BP214** purity = 96.8%;  $t_R$  = 14.6 min; calculated  $m/z$  for  $C_{72}H_{126}N_{19}O_{12}$   $[M+H]^+$  = 1448.98;  
experimental  $m/z$  = 1448.51

## Reverse-phase HPLC Setup

For all experiments:

- **Buffer A:** 99.9% Water, 0.1% TFA
- **Buffer B:** 89.95% MeCN, 9.95% Water, 0.1% TFA

## Analytical HPLC

- **Pump:** Waters™ 600 Pump
- **Detector:** Waters™ 2996 Photodiode Array Detector
- **Column:** Waters™ Symmetry™ C18, 4.6 x 250 mm, 5 μm

### Gradient:

| Time (min) | Flow (ml/min) | Buffer A | Buffer B |
|------------|---------------|----------|----------|
| 0.0        | 1.50          | 100%     | 0%       |
| 20.0       | 1.50          | 30%      | 70%      |
| 22.0       | 1.50          | 0%       | 100%     |
| 27.0       | 1.50          | 0%       | 100%     |
| 30.0       | 1.50          | 100%     | 0%       |

Equilibration delay between injections (both methods): 9 min with 100% Buffer A, 1.50 ml/min. The ApexTrack™ algorithm has been used for peak integration. Peaks having an area <0.01% were not included in the purity calculations. Spectra were processed as follows: the raw data were exported using the Waters Empower 3 software and imported in Microsoft Excel. The baseline (blank) was subtracted and negative absorbance values were corrected to 0 (zero).

## Preparative HPLC

- **Pump:** Waters™ 600 Pump
- **Detector:** Waters™ 996 Photodiode Array Detector
- **Column:** Waters™ XBridge™ BEH130 C18, 10 x 250 mm, 5 μm

### Gradient:

| Time (min) | Flow (ml/min) | Buffer A | Buffer B |
|------------|---------------|----------|----------|
| 0.0        | 4.00          | 100%     | 0%       |
| 1.0        | 6.00          | 100%     | 0%       |
| 3.0        | 8.50          | 100%     | 0%       |
| 5.0        | 8.50          | 90%      | 10%      |
| 20.0       | 8.50          | 45%      | 55%      |
| 26.0       | 9.00          | 0%       | 100%     |
| 27.0       | 9.00          | 0%       | 100%     |
| 30.0       | 9.00          | 100%     | 0%       |
| 39.0       | 9.00          | 100%     | 0%       |

Purified fractions were collected manually.

## Analytical Chromatograms

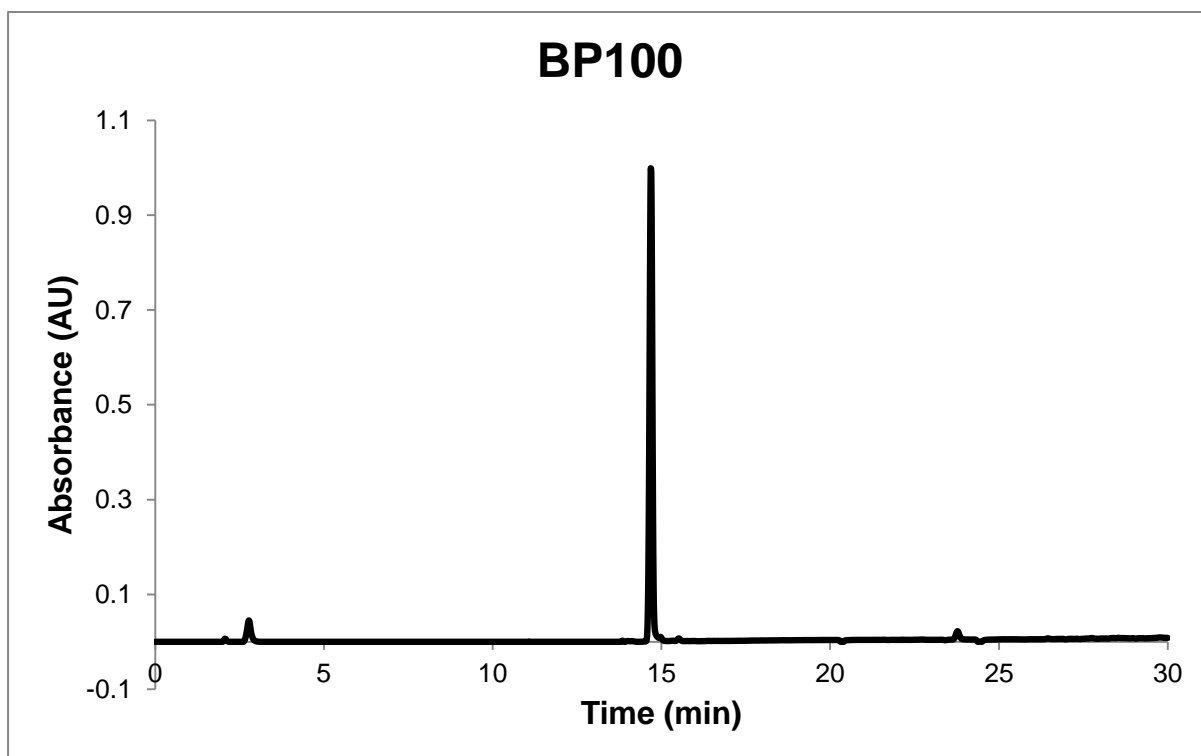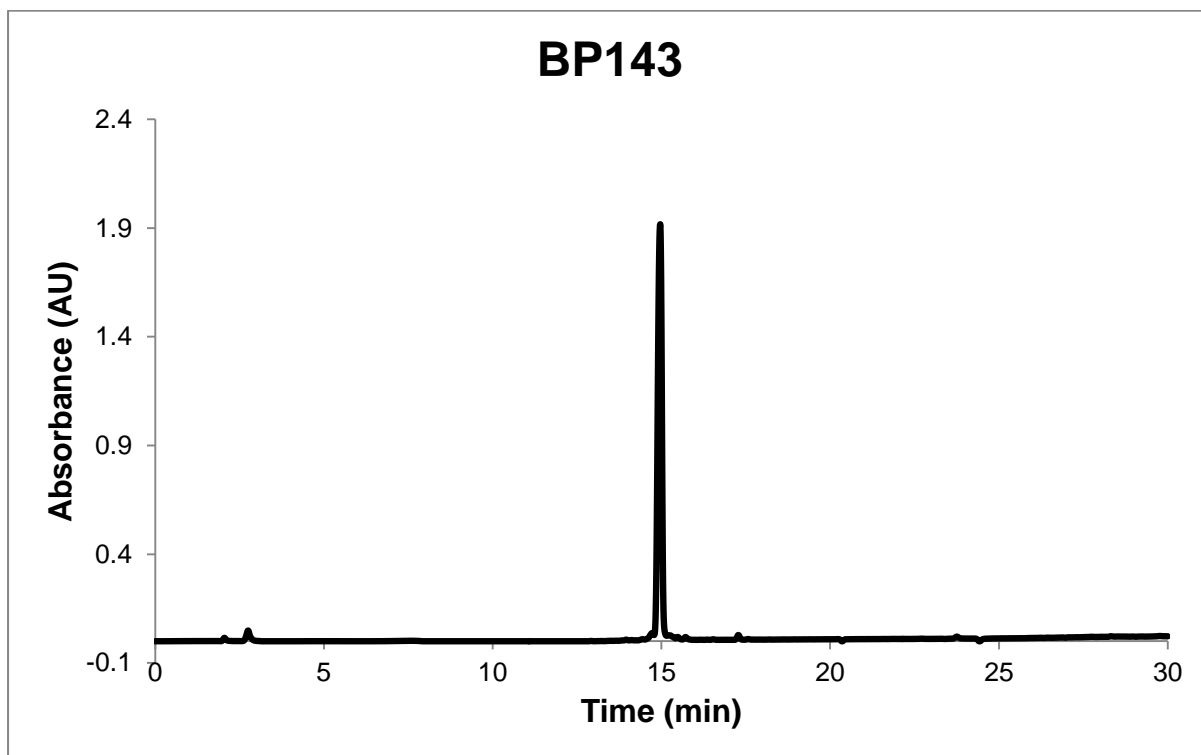

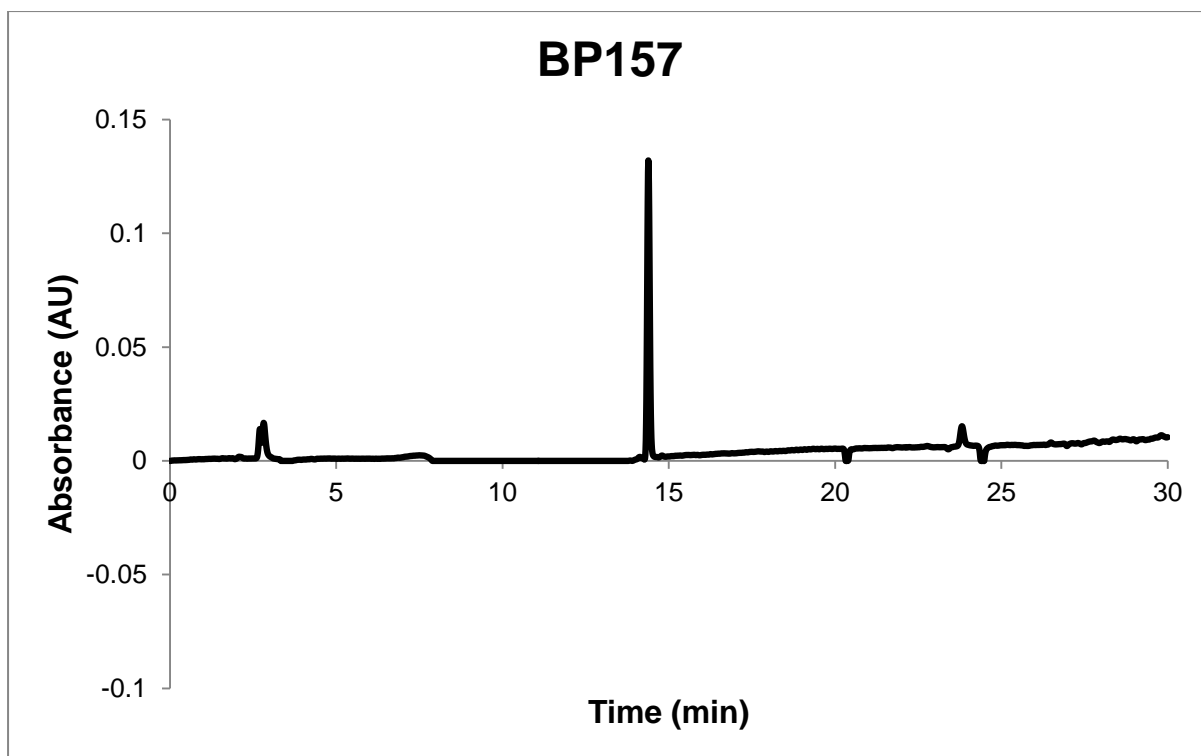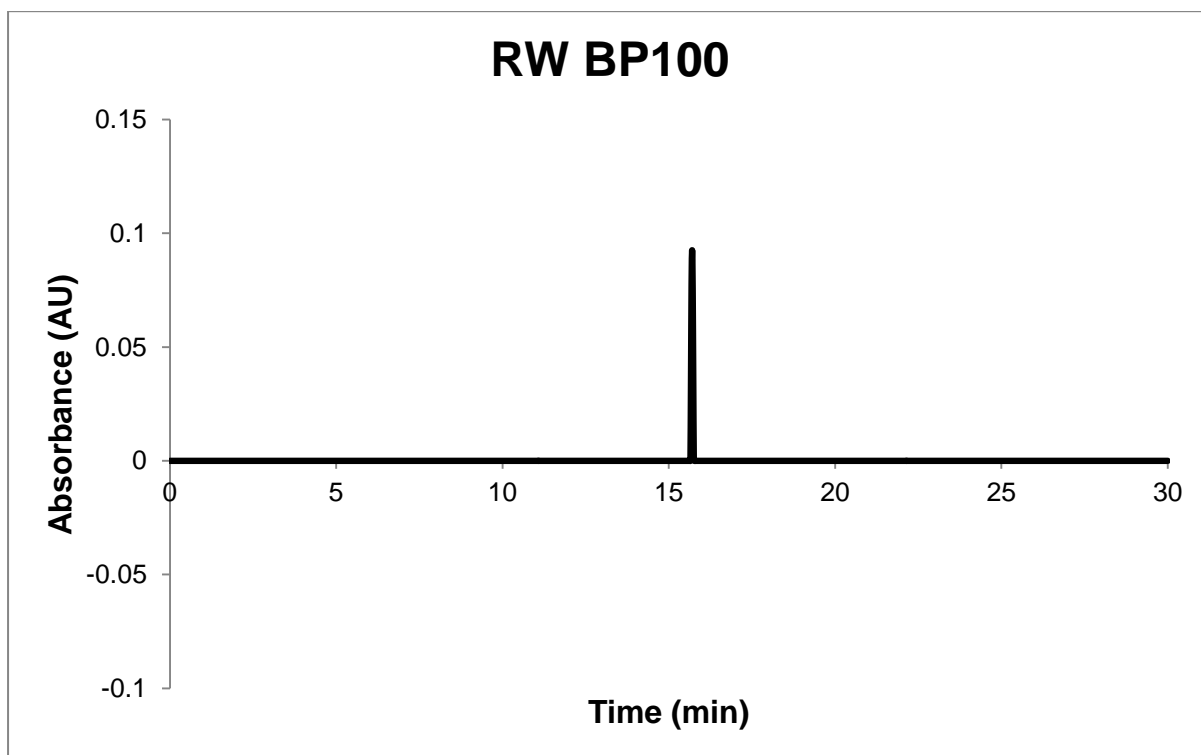

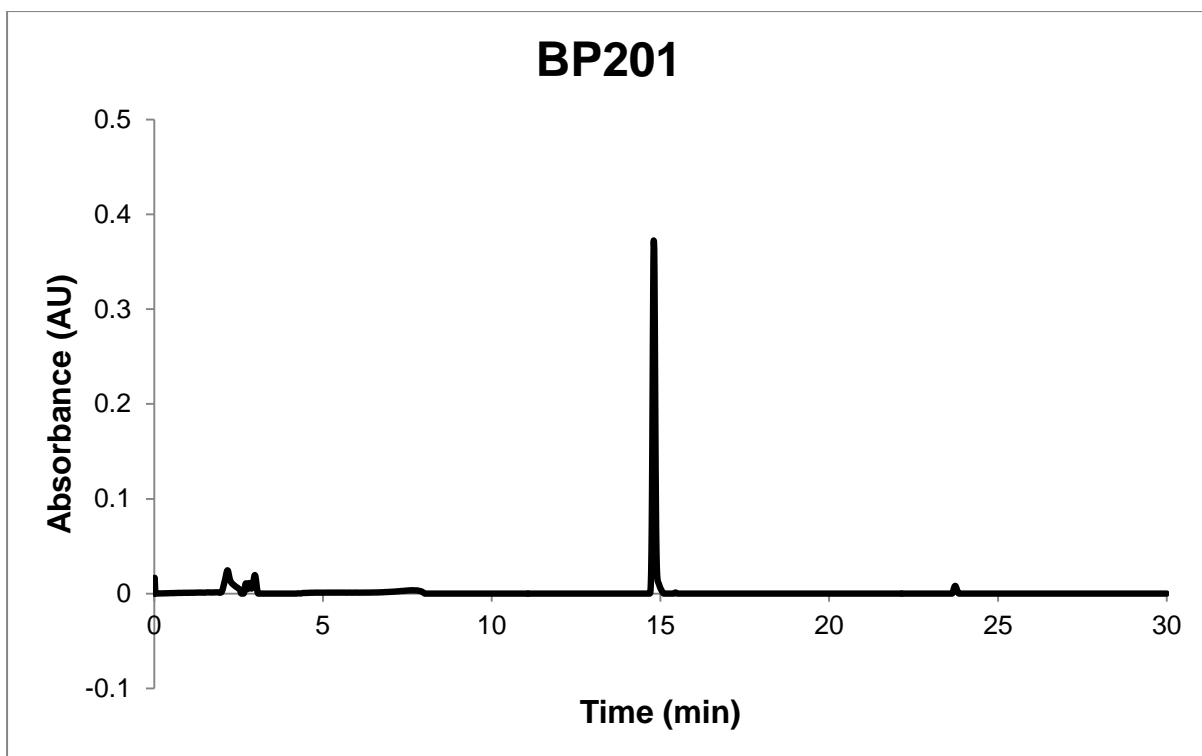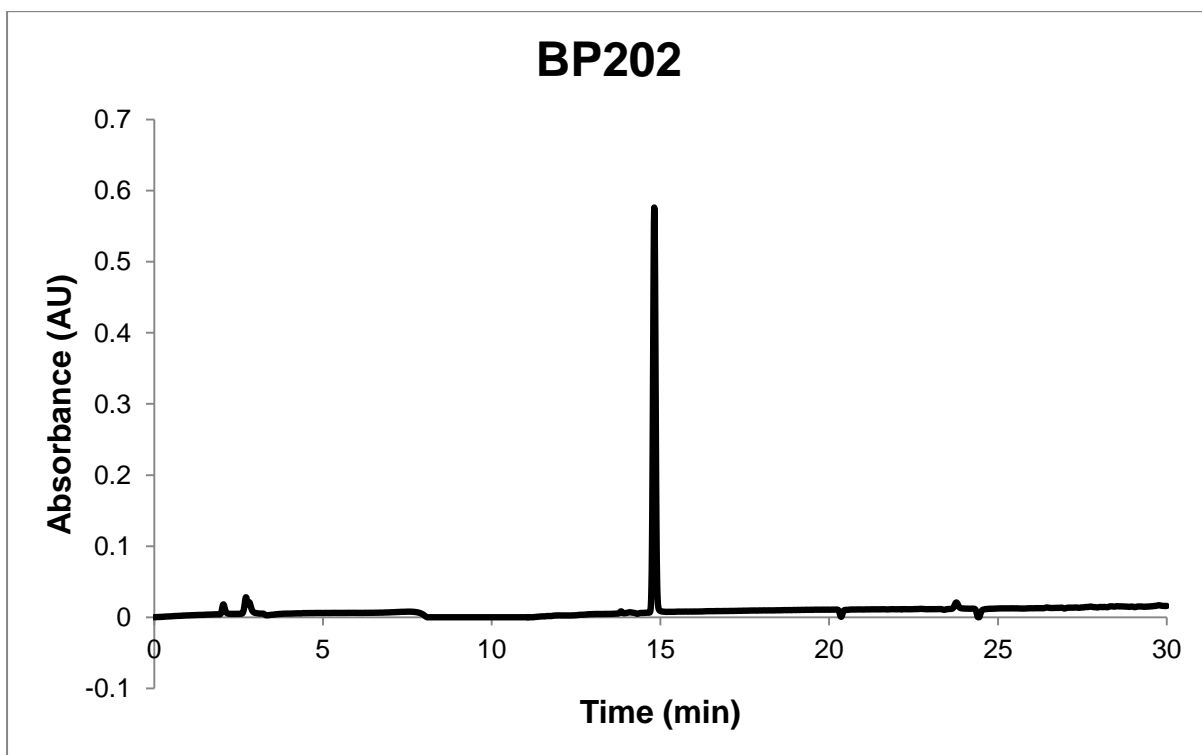

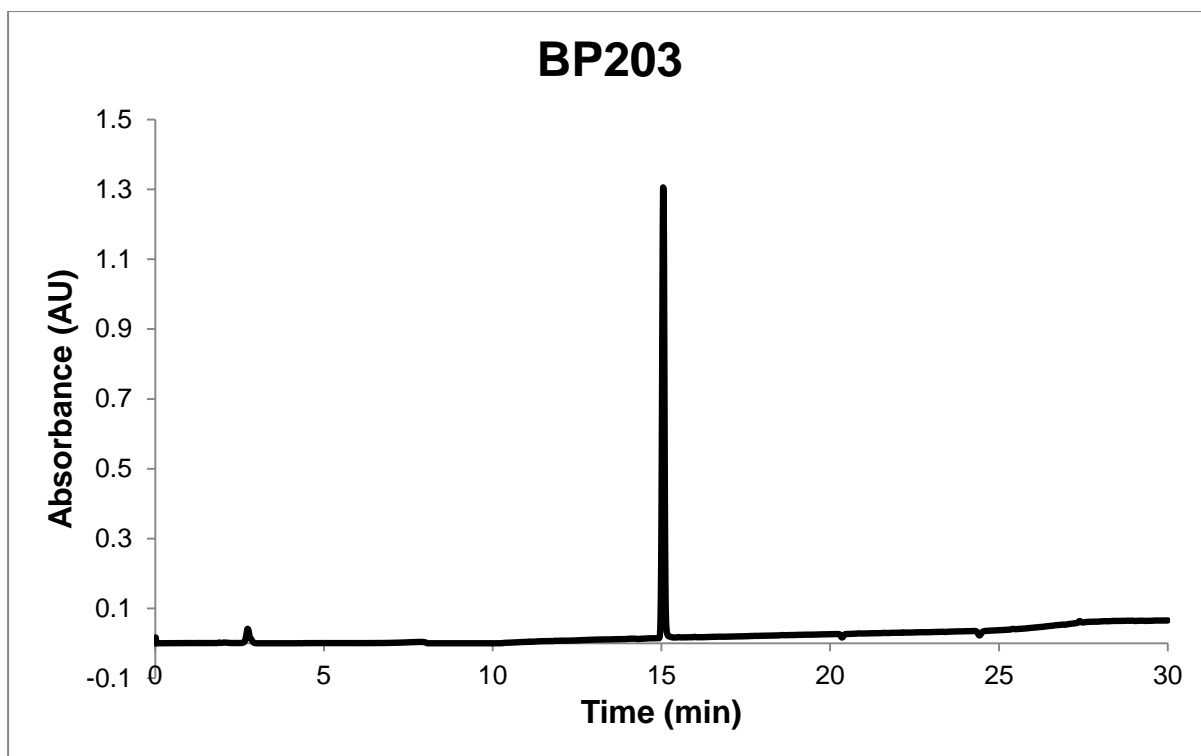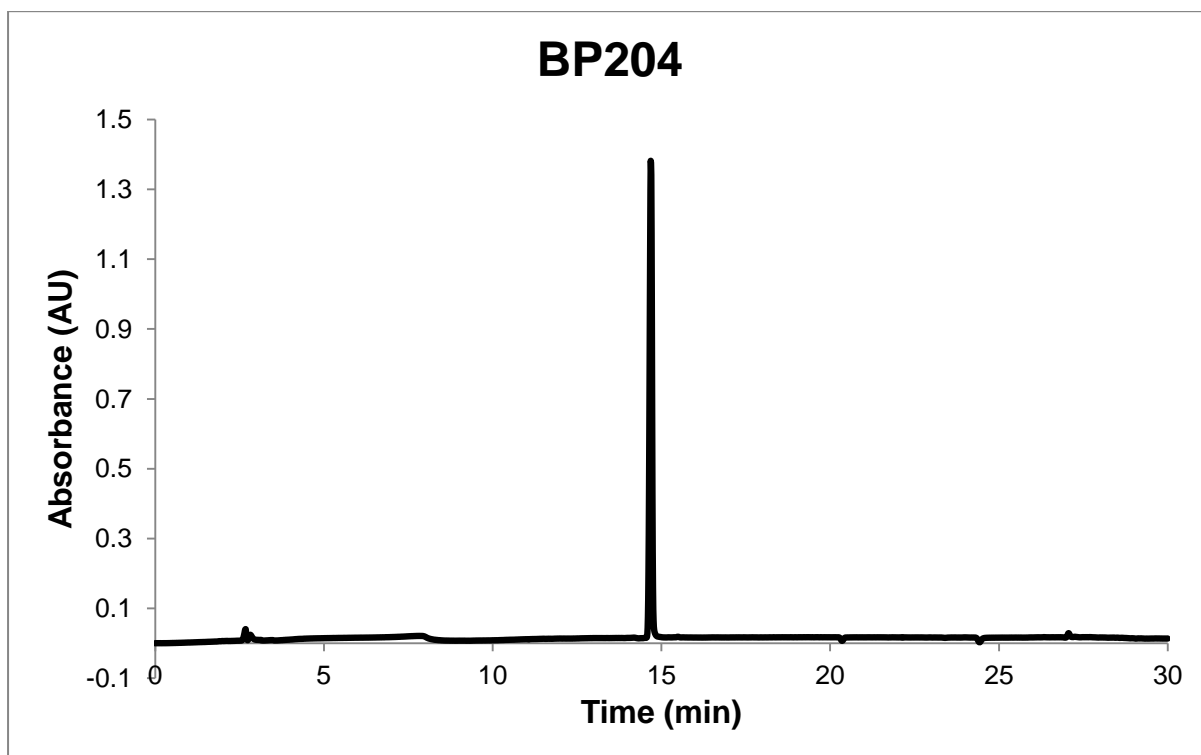



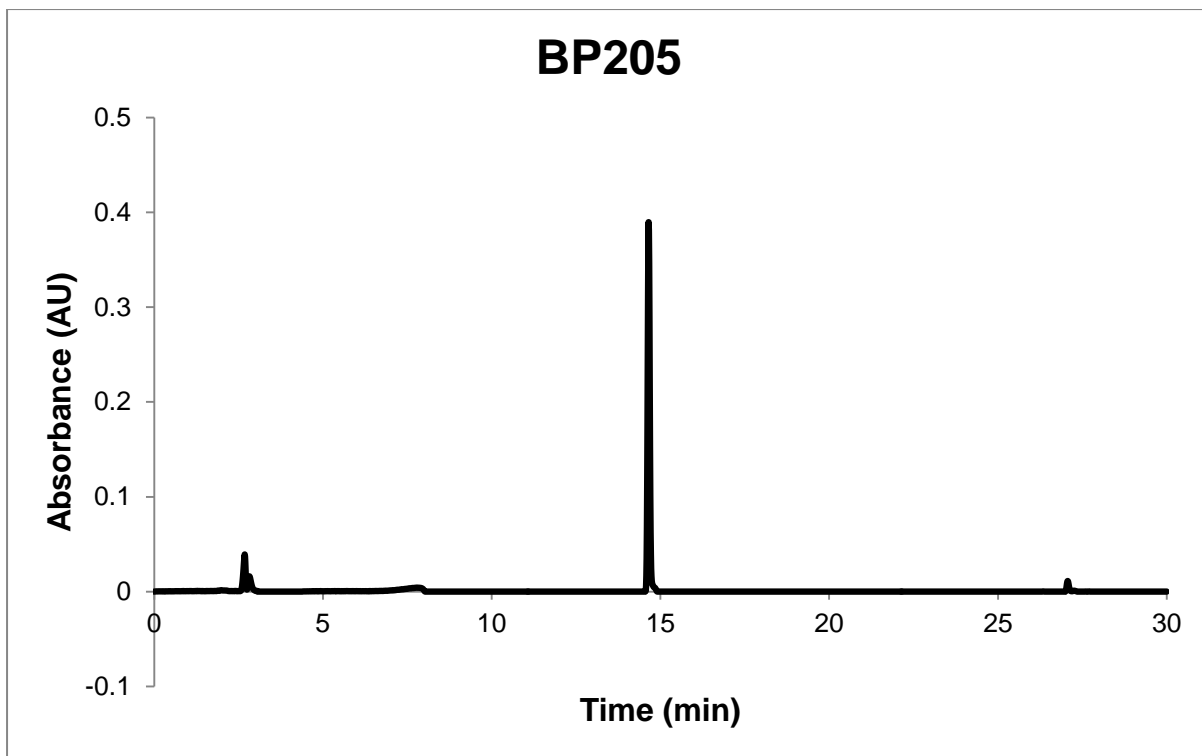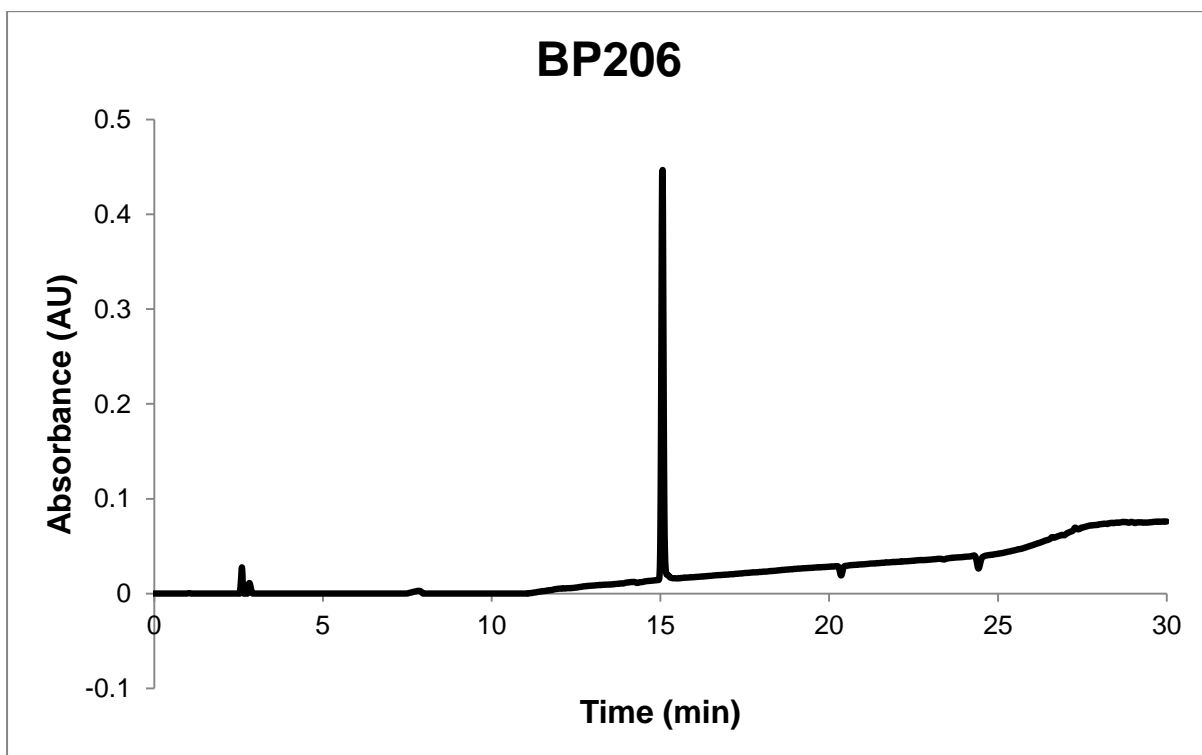

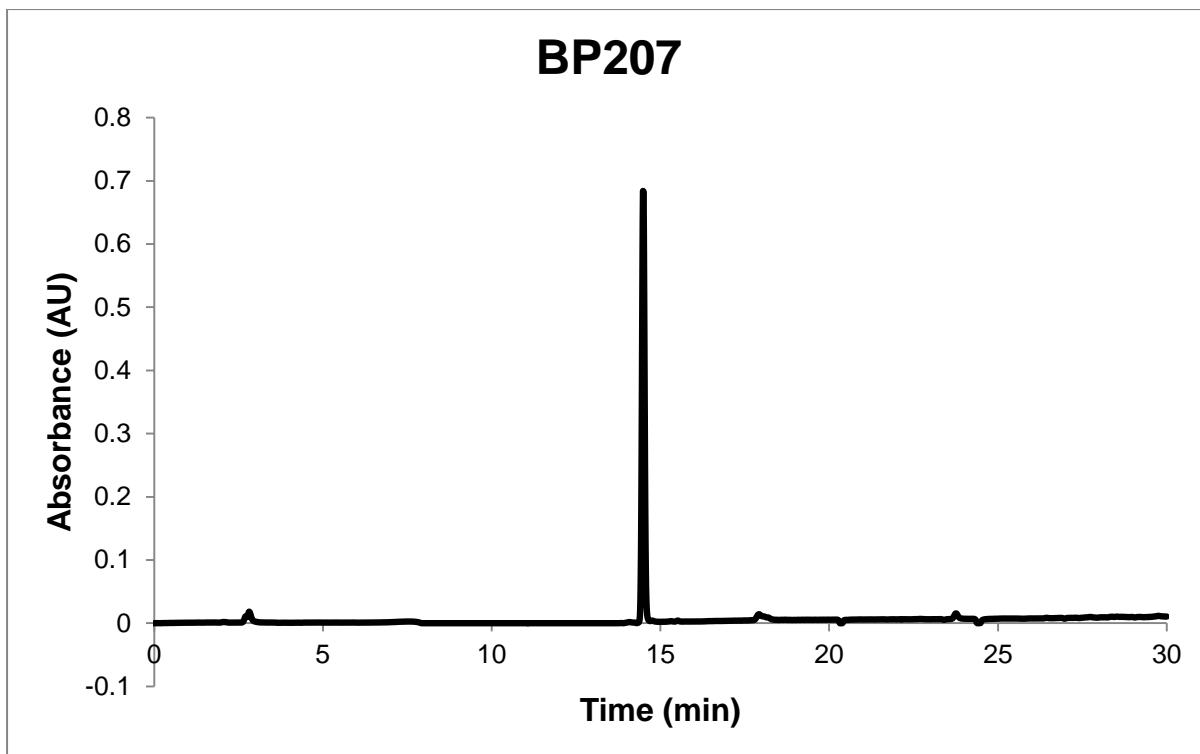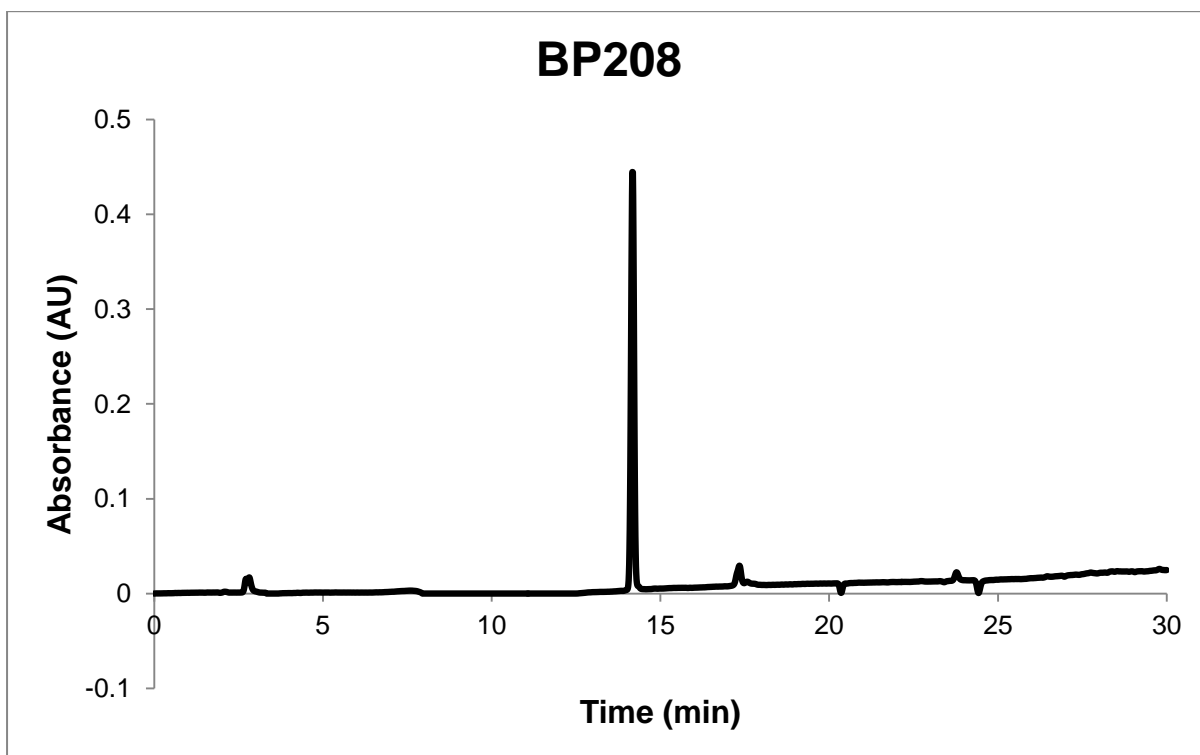

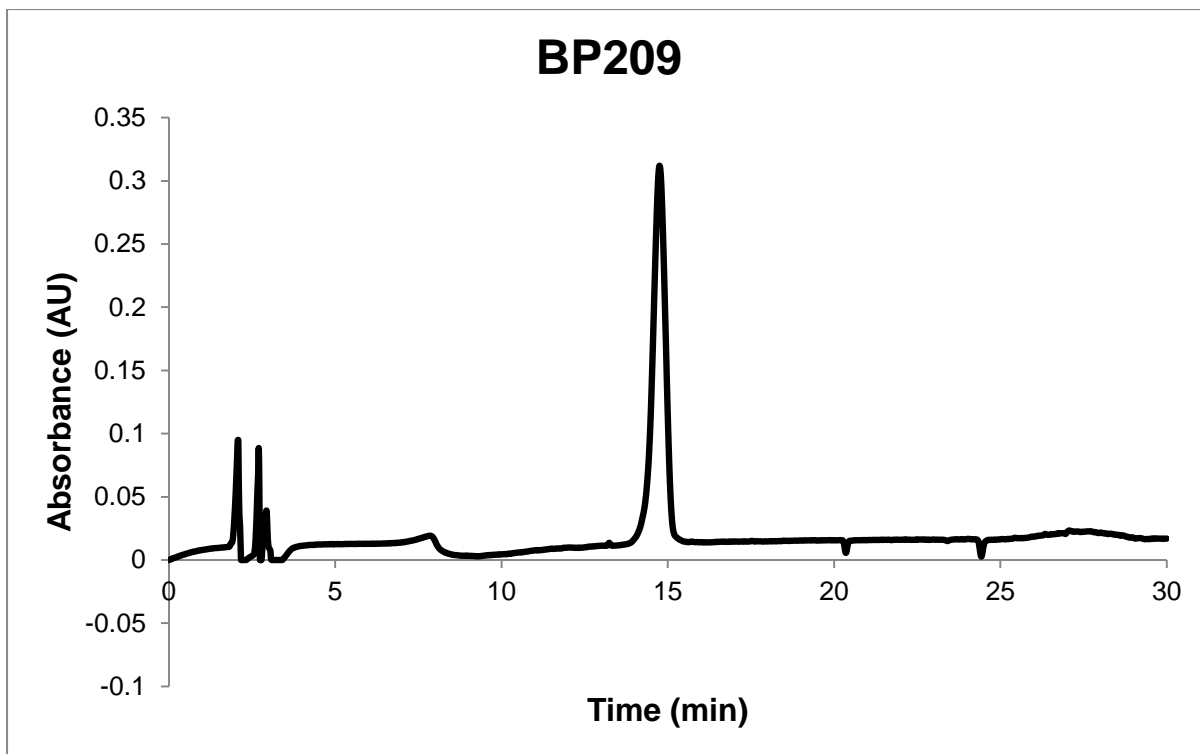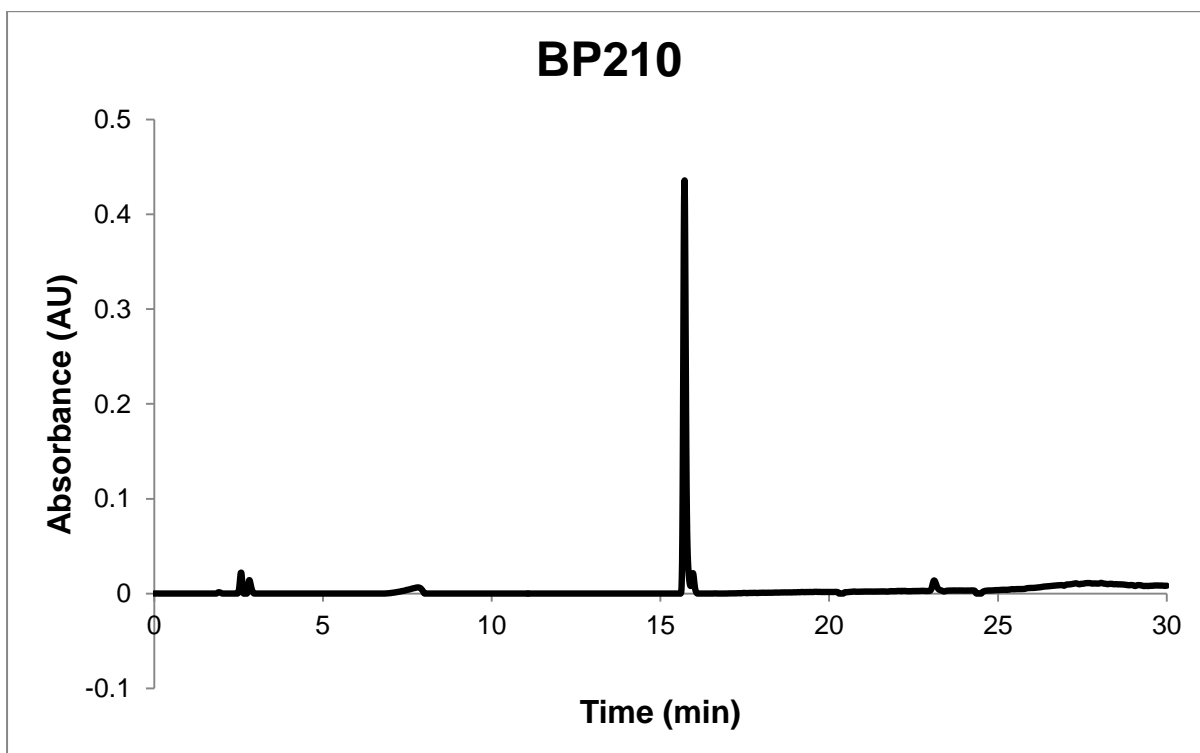

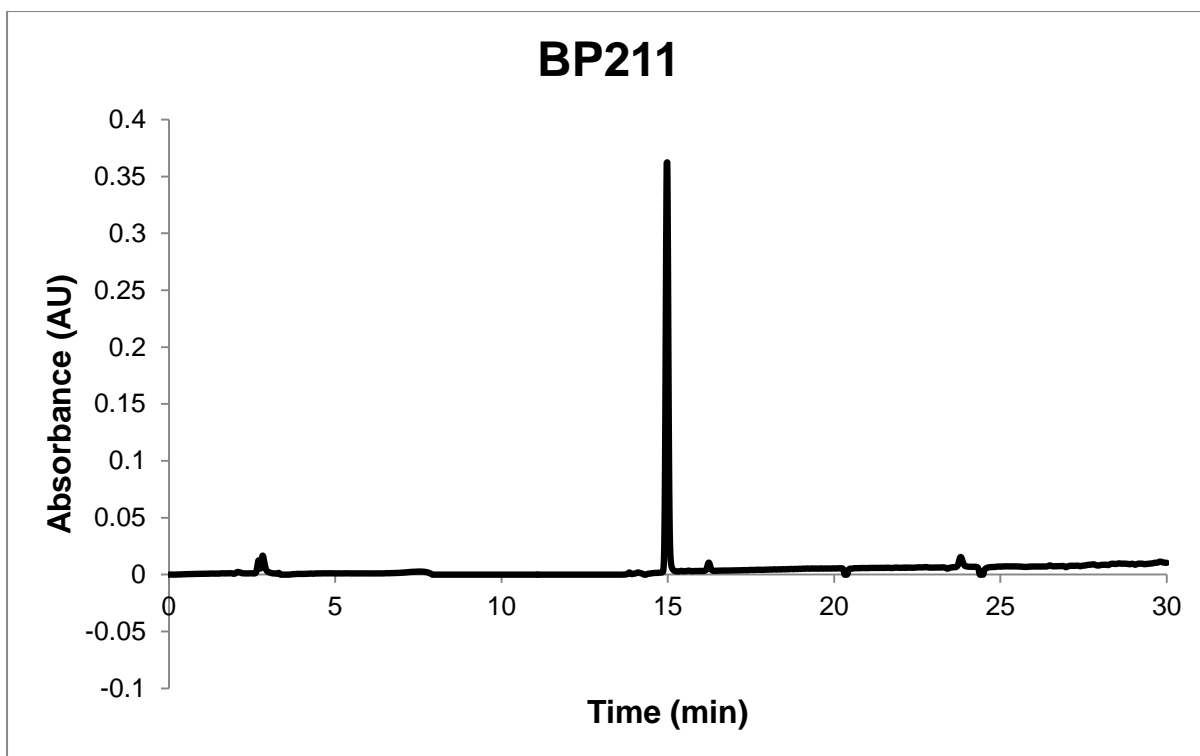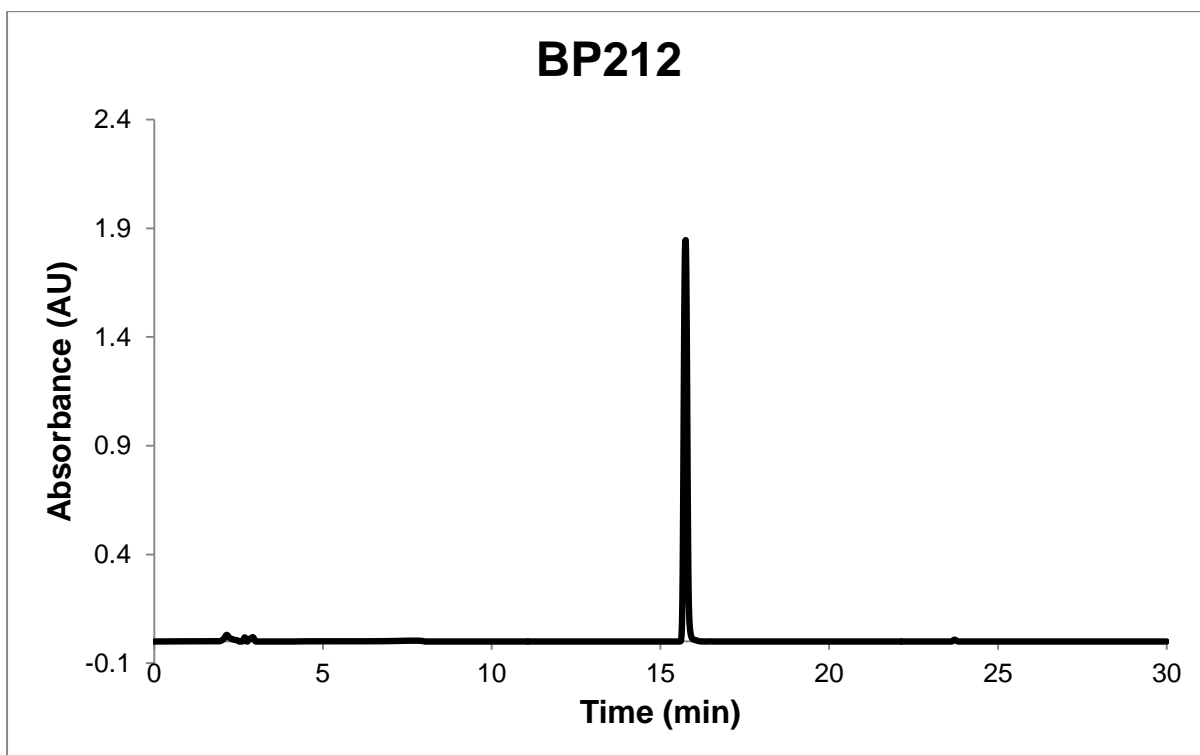

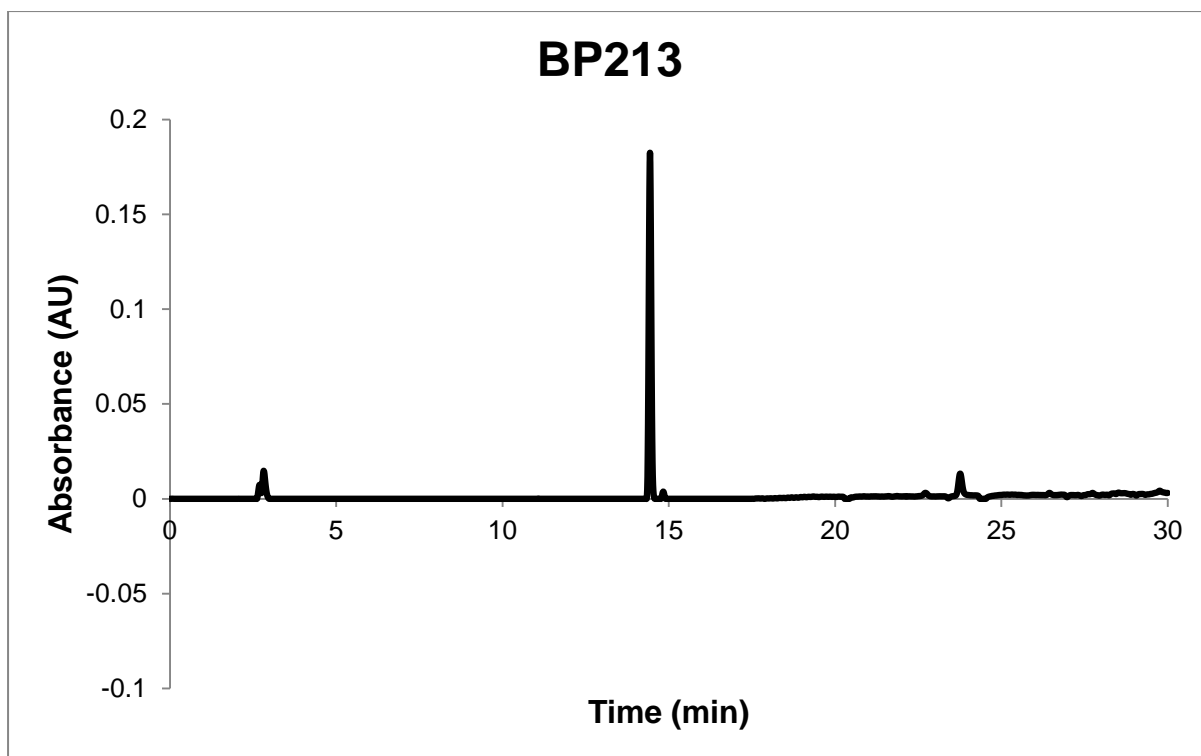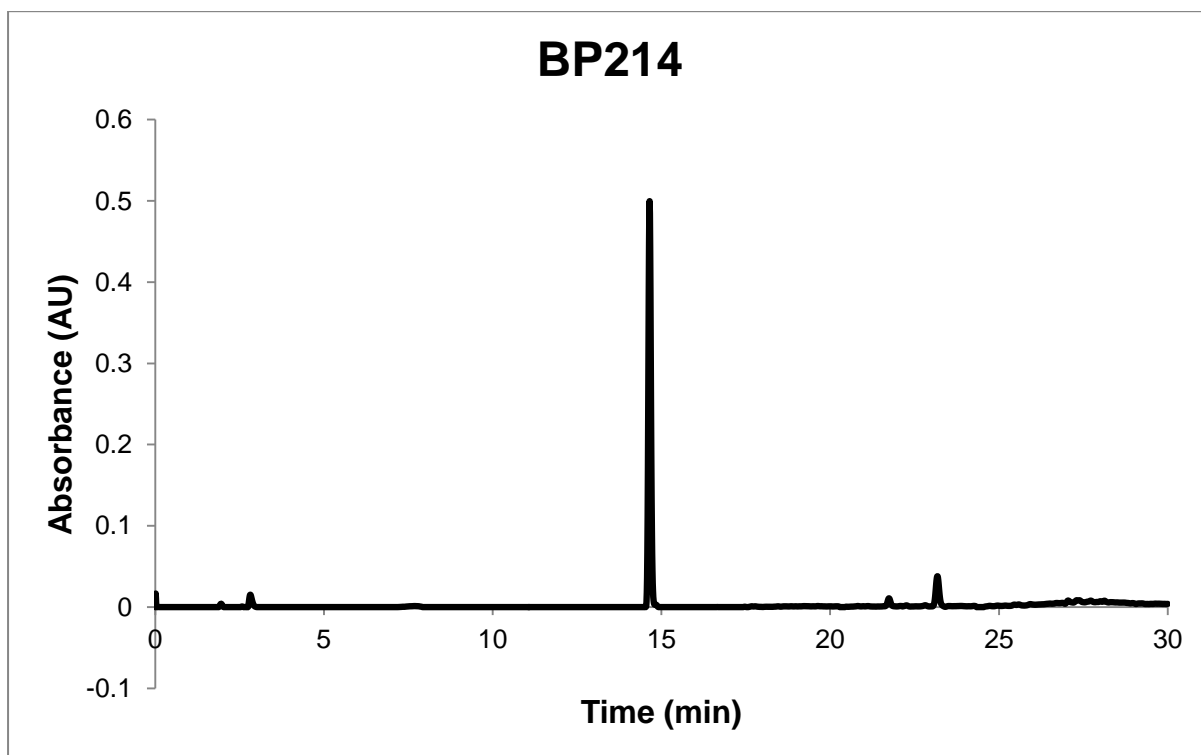

## MALDI-ToF-MS Setup

**Instrument:** Bruker Microflex™

**Matrix:**  $\alpha$ -cyano-4-hydroxycinnamic acid in MeCN:H<sub>2</sub>O:TFA (50:47.5:2.5) (10 mg/ml).

## MALDI Spectra

**BP100**

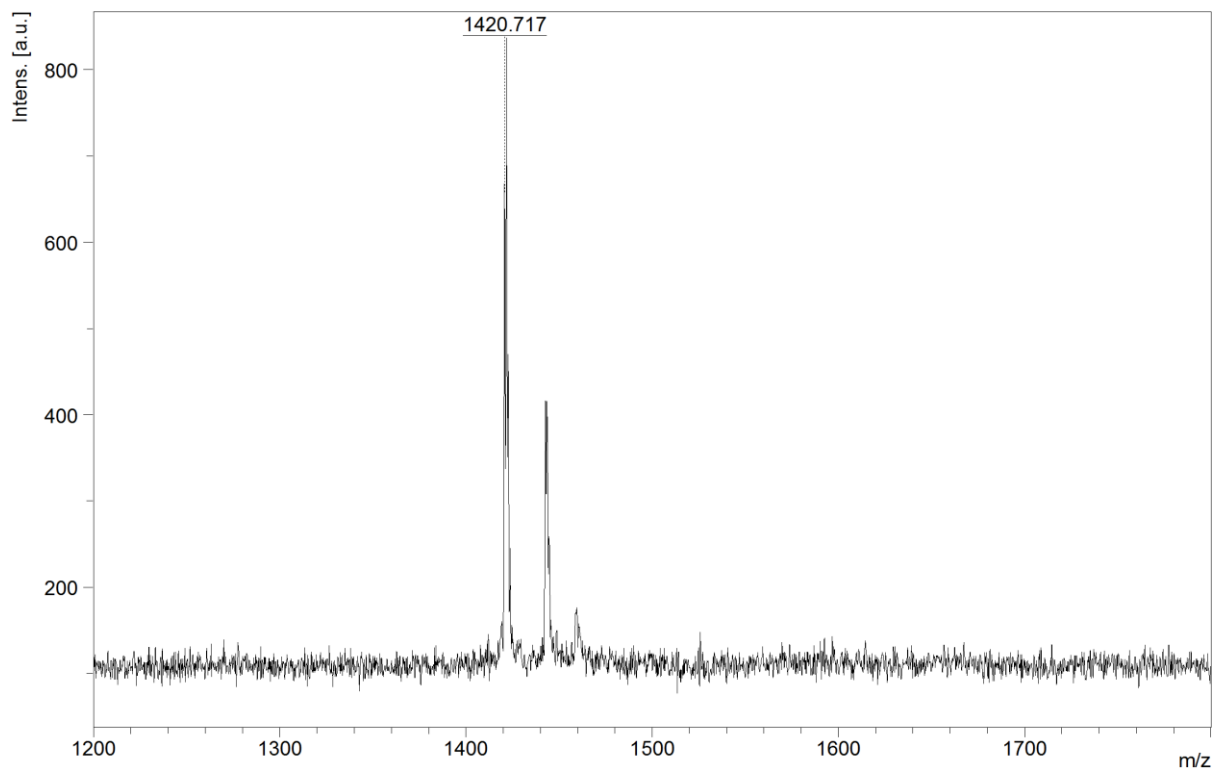

### BP143

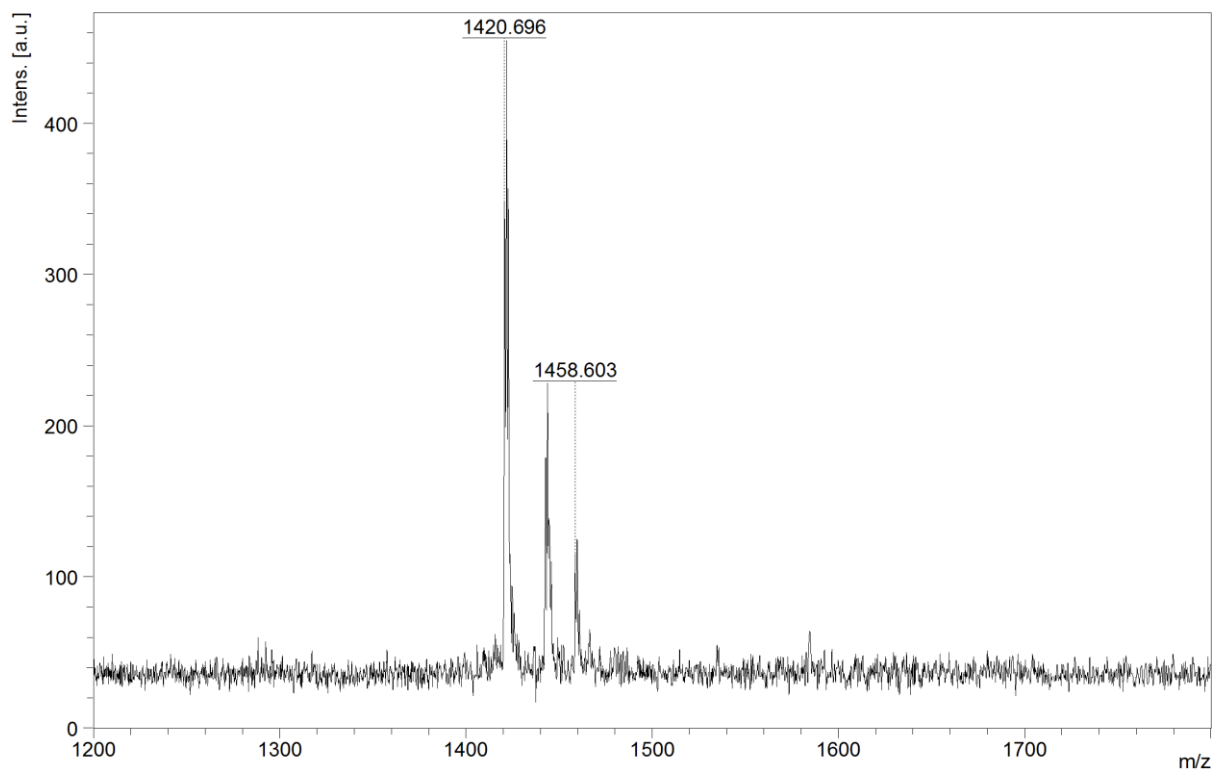

### BP157

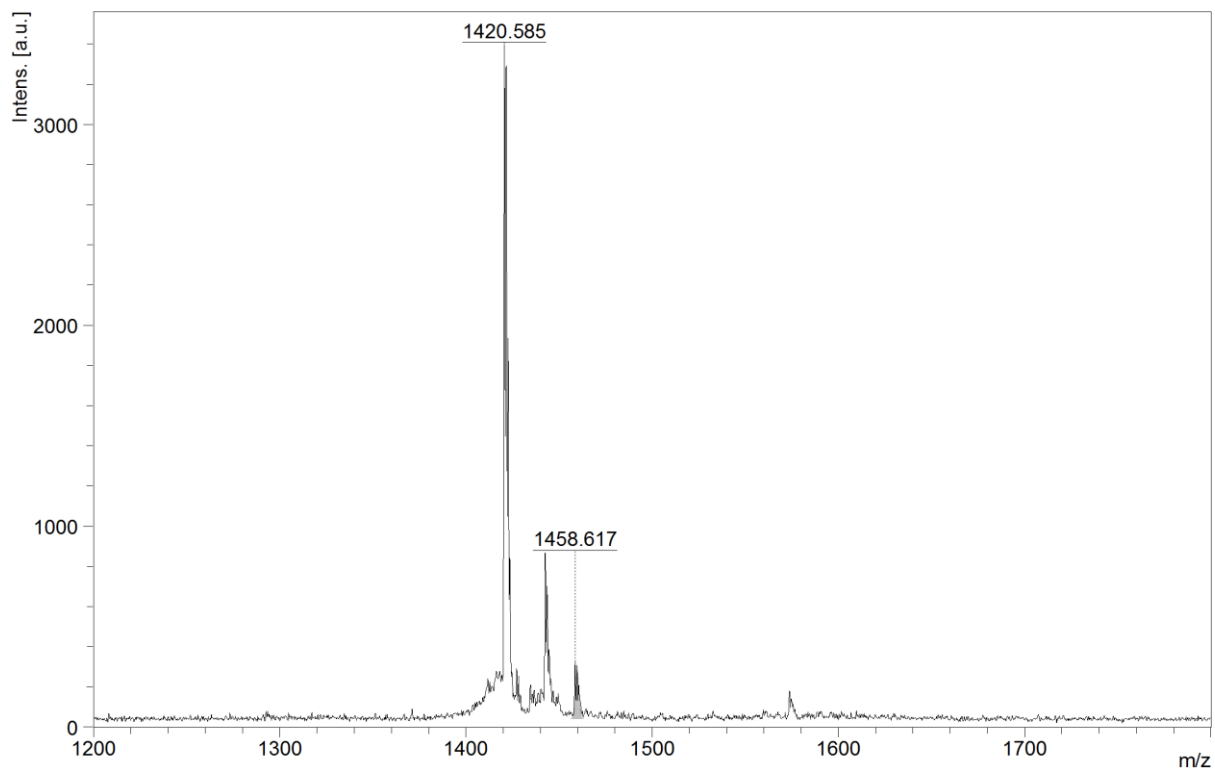

## RW-BP100

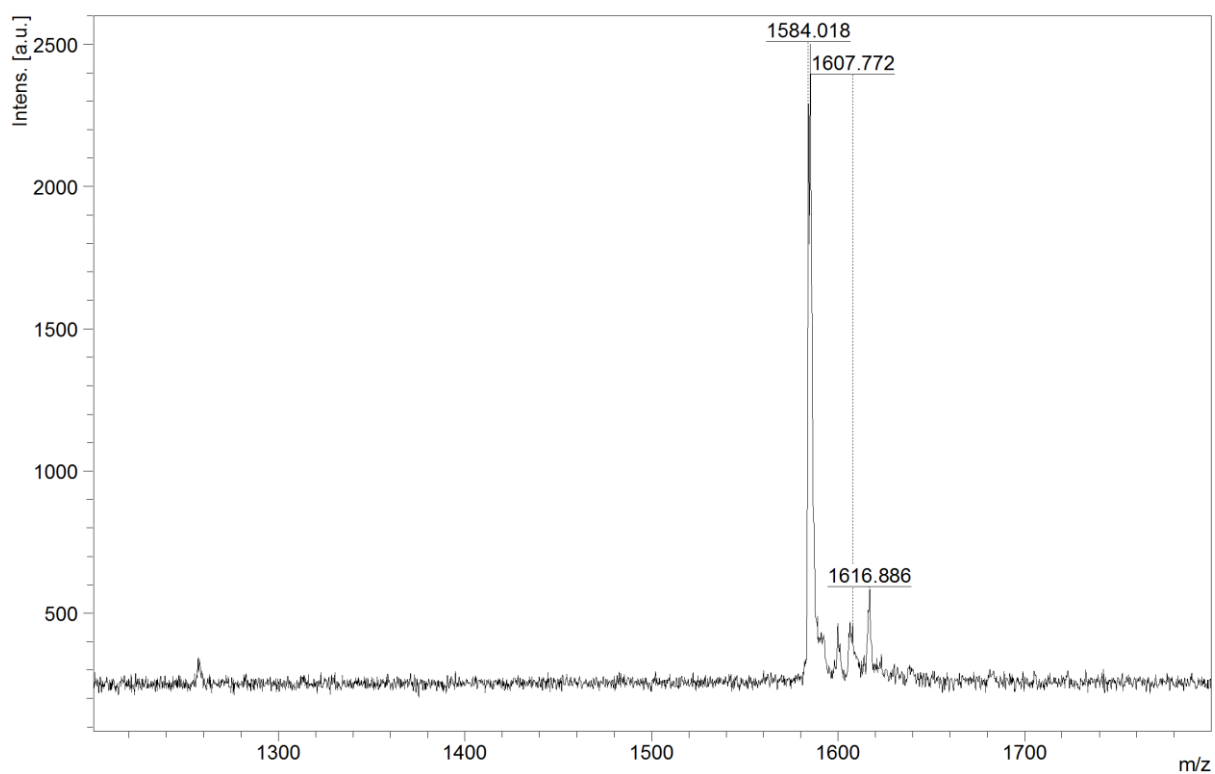

## BP201

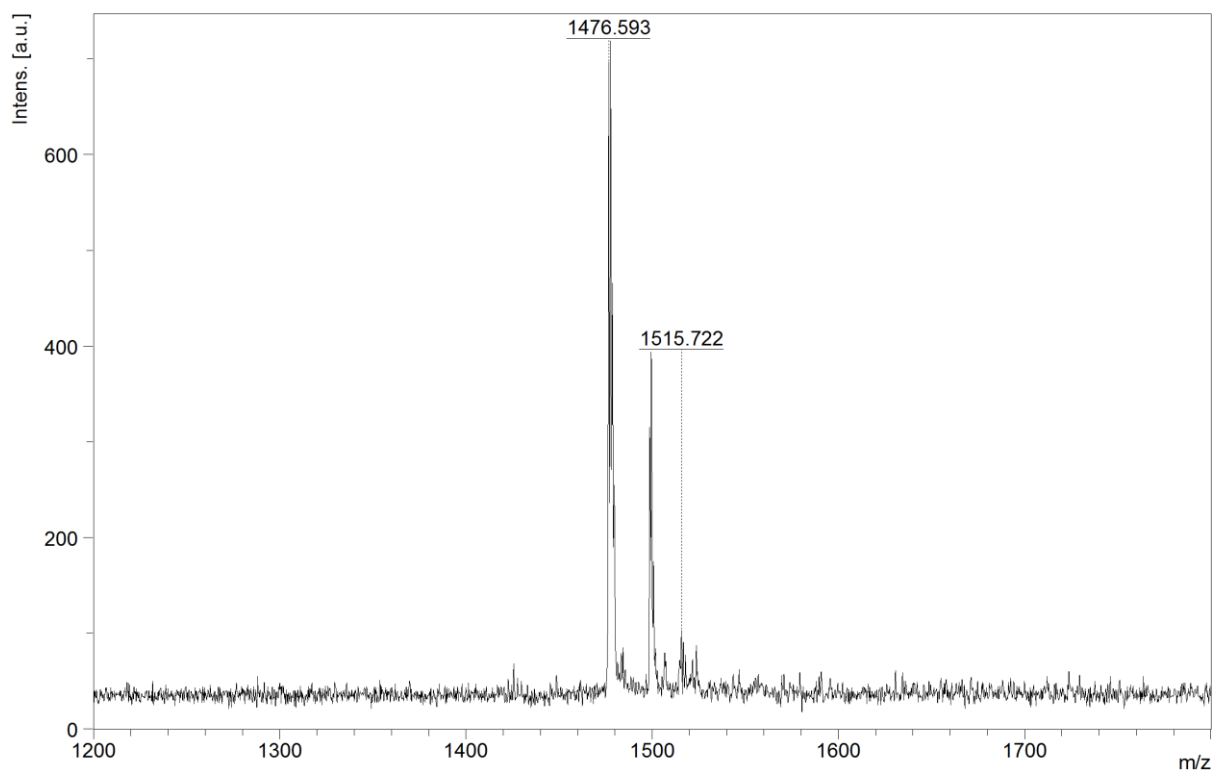



### BP202

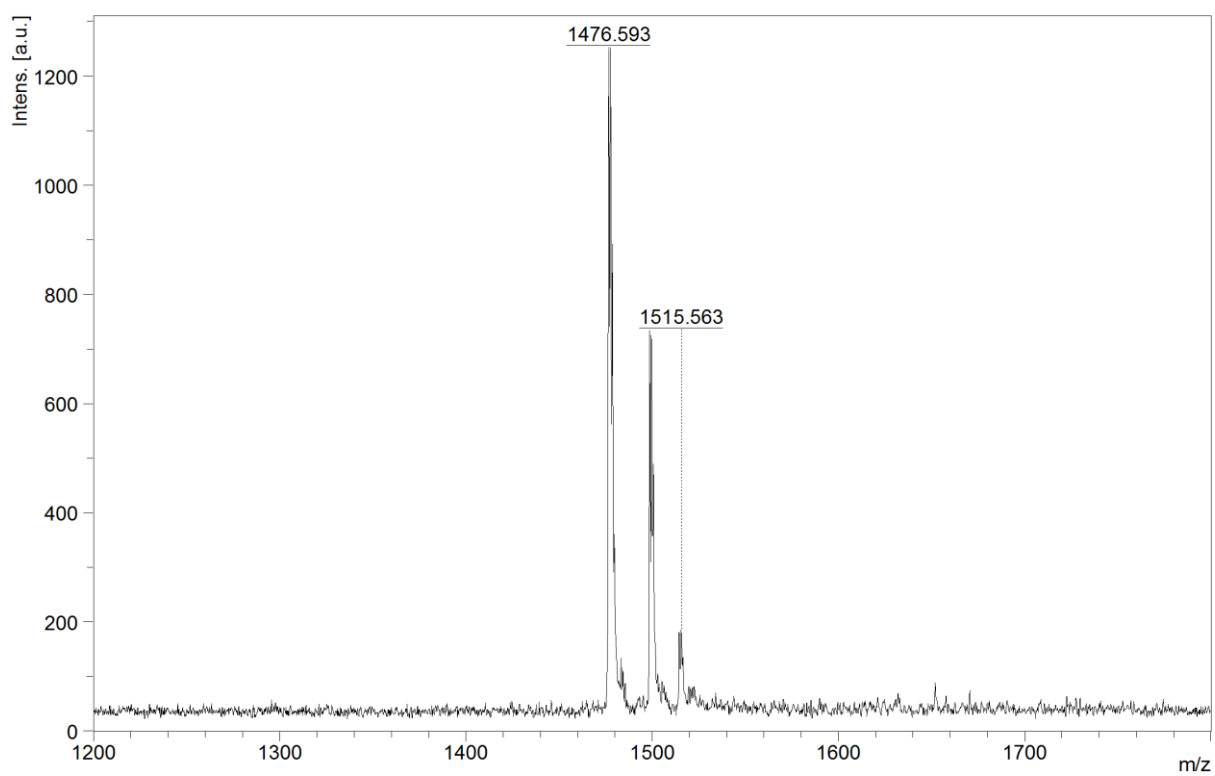

### BP203

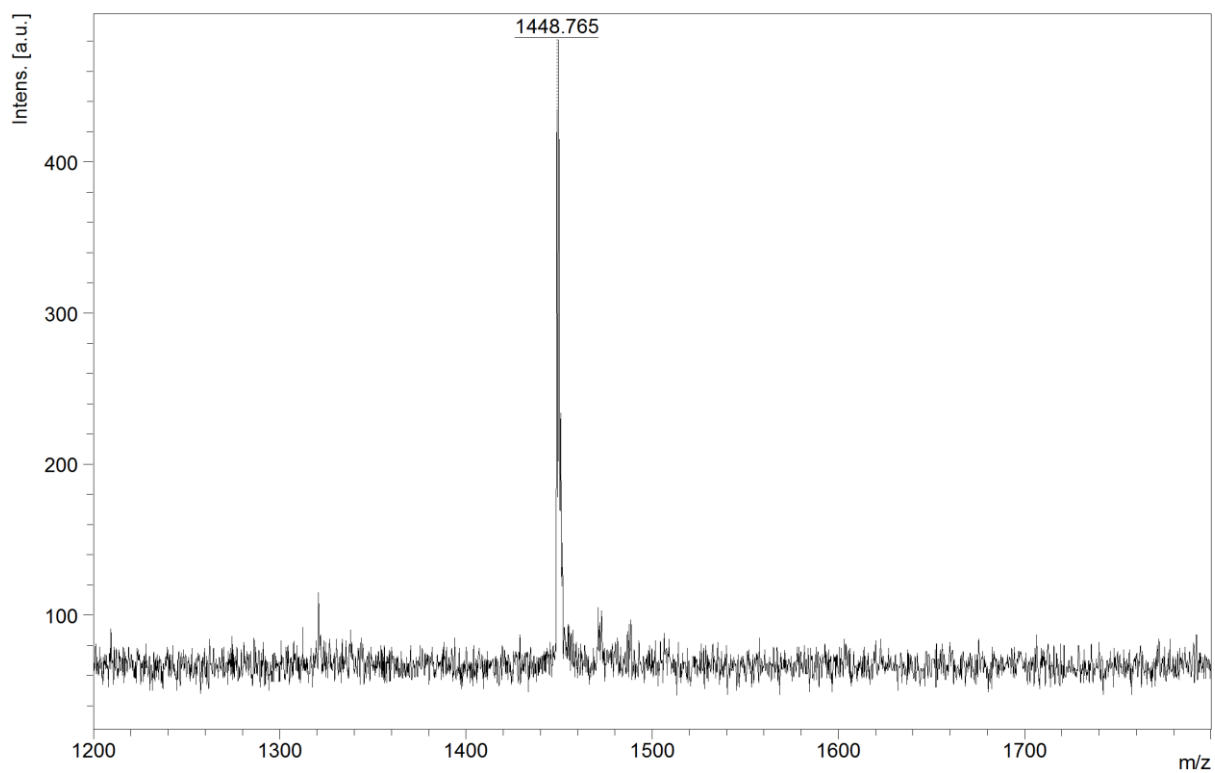

### BP204

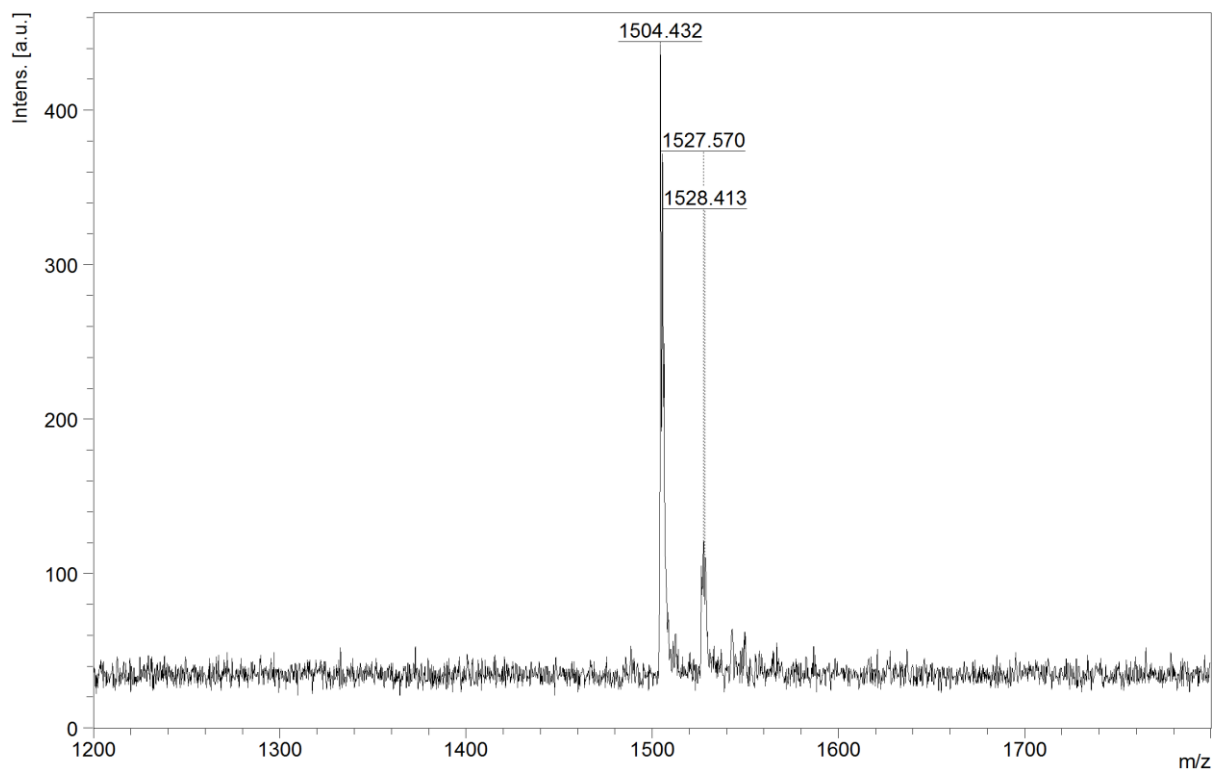

### BP205

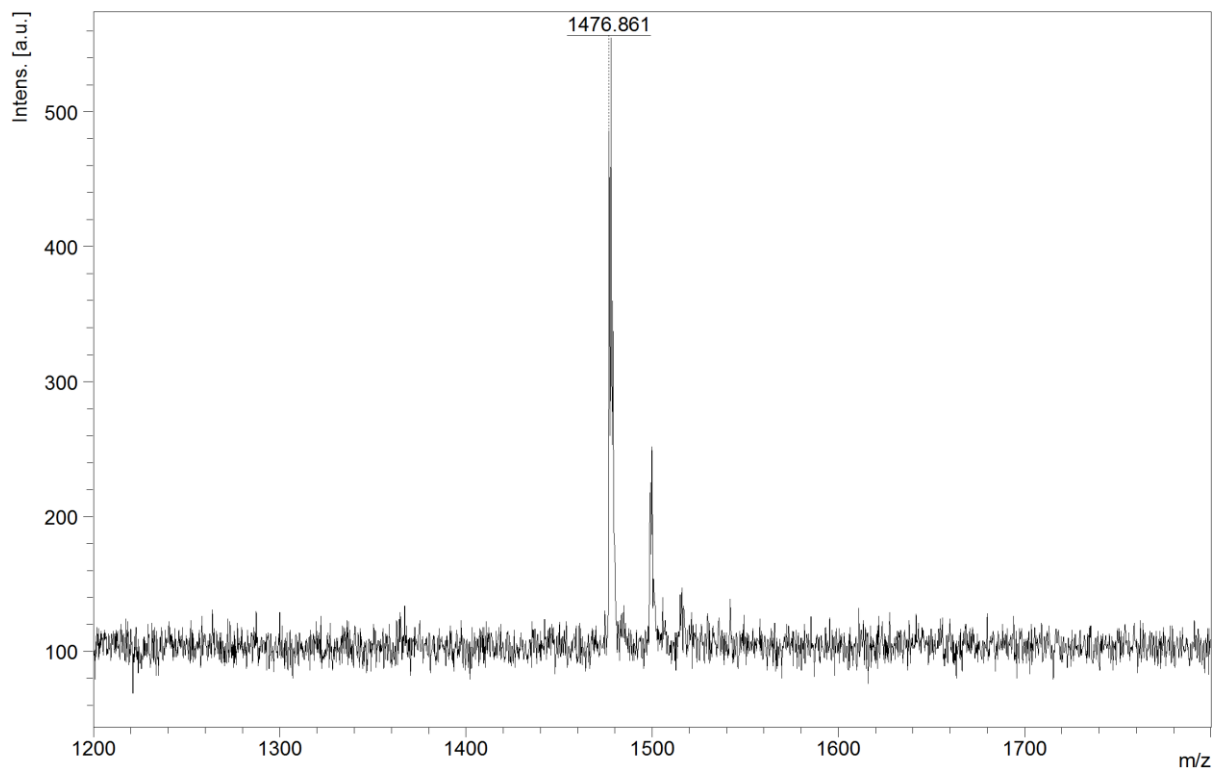

### BP206

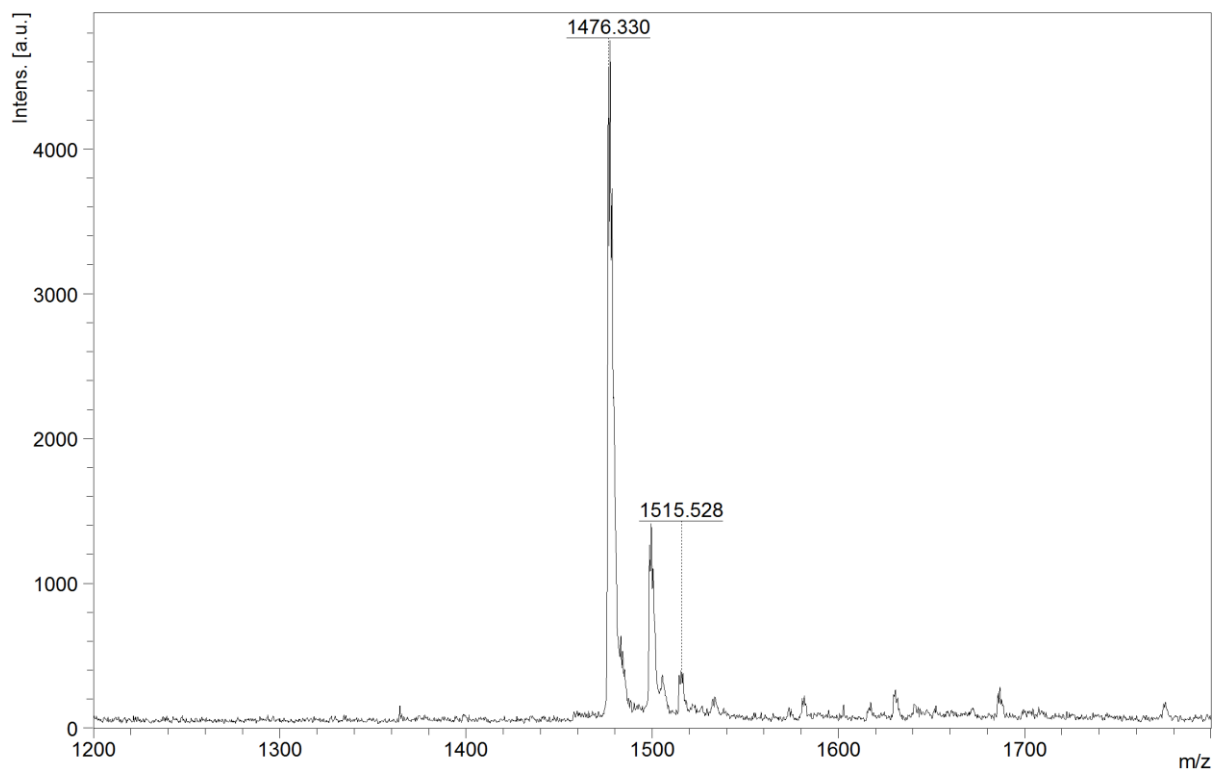

### BP207

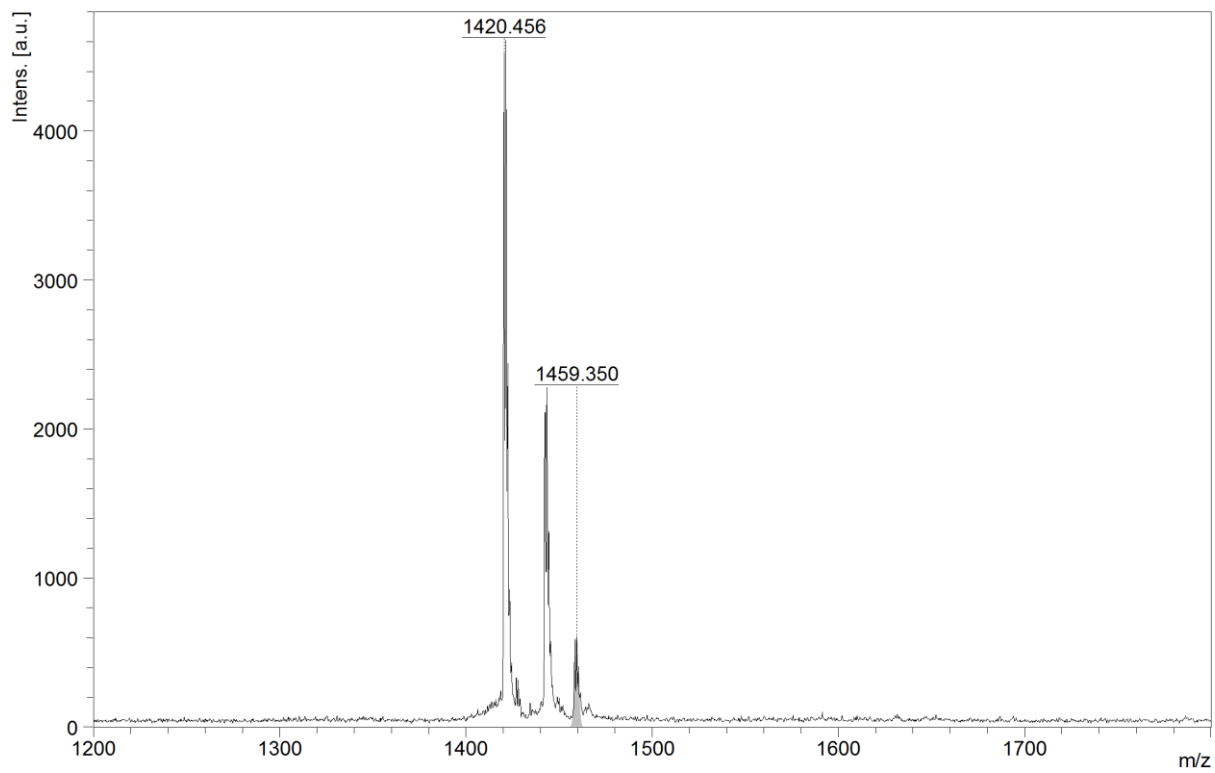

## BP208

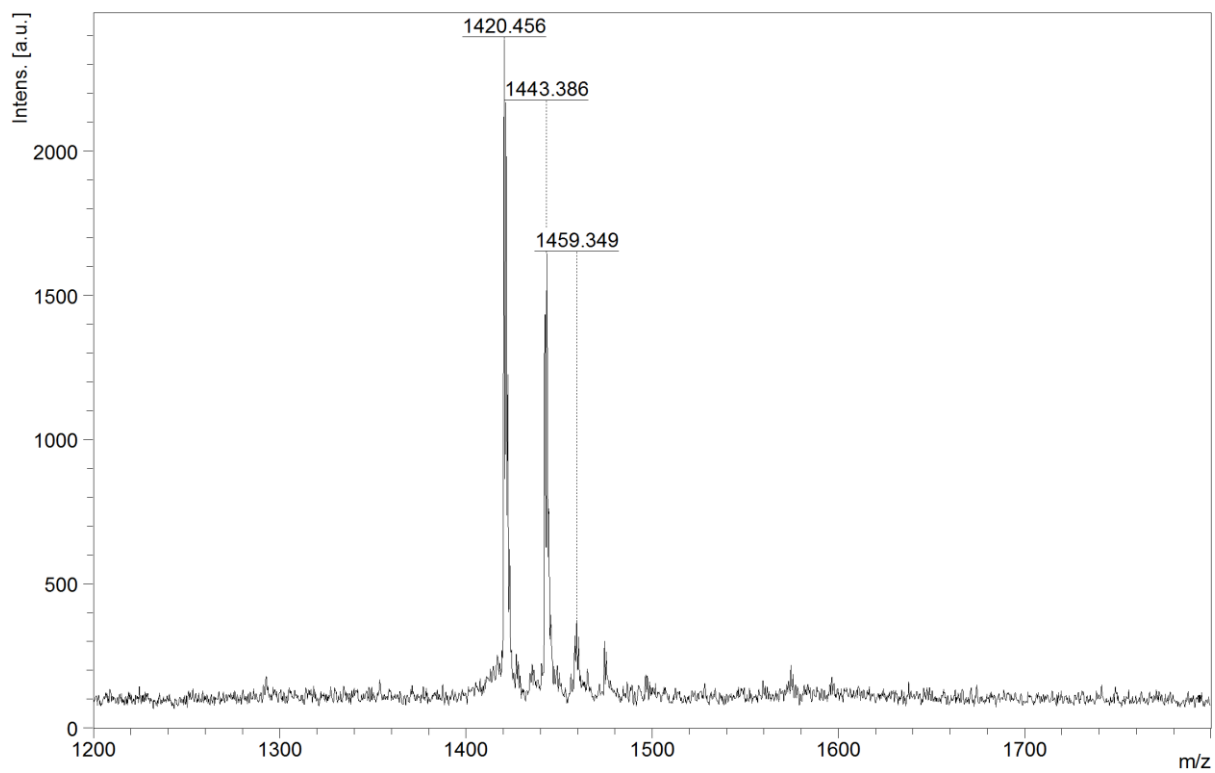

## BP209

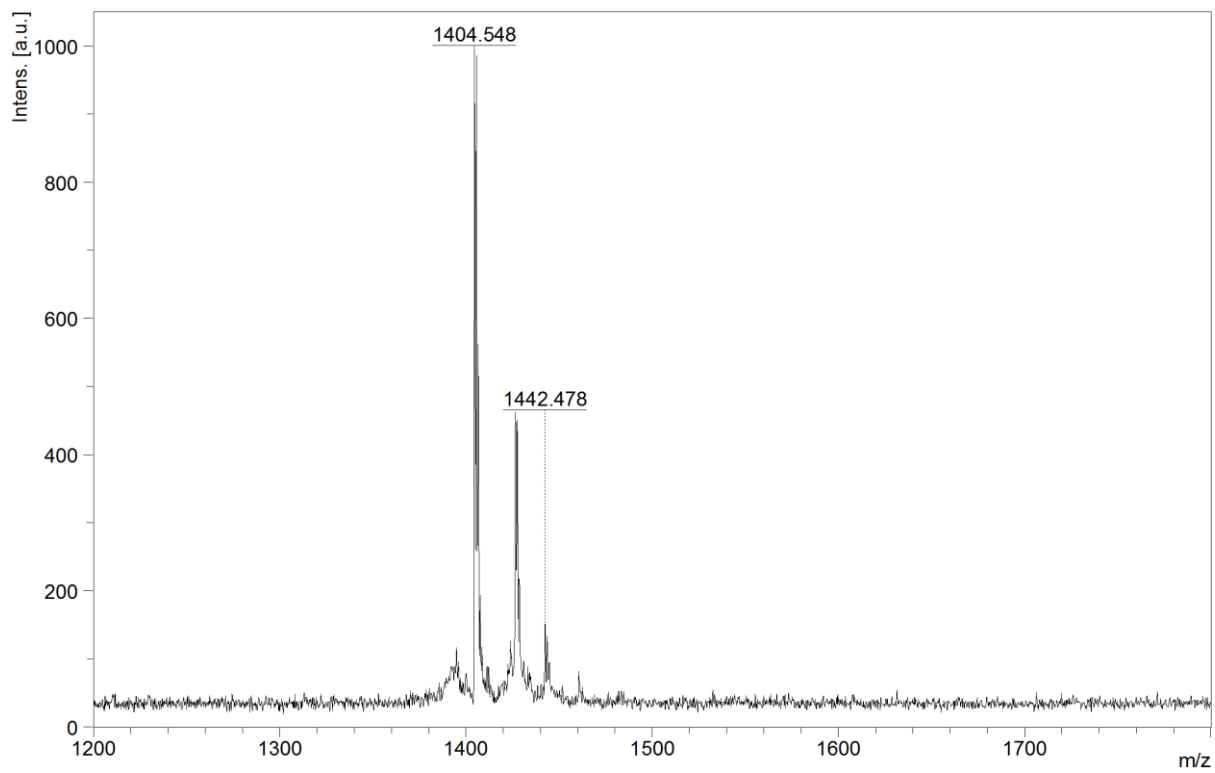

### BP210

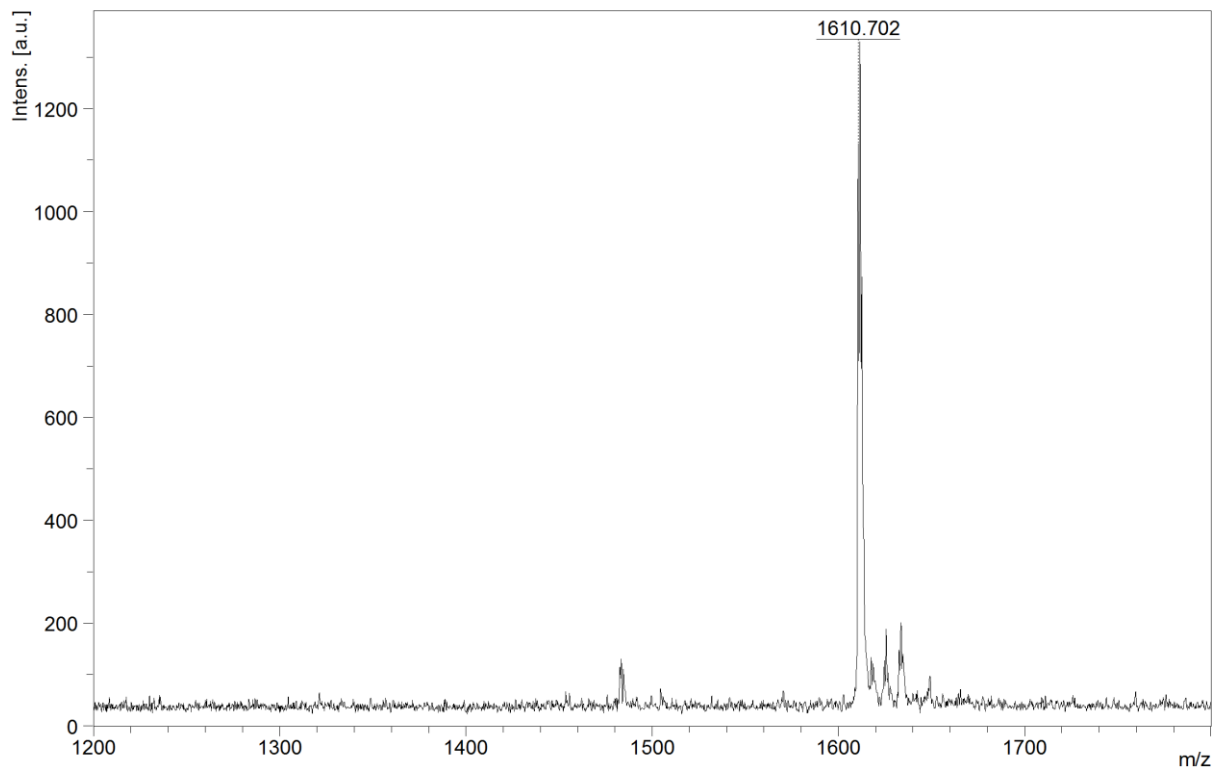

### BP211

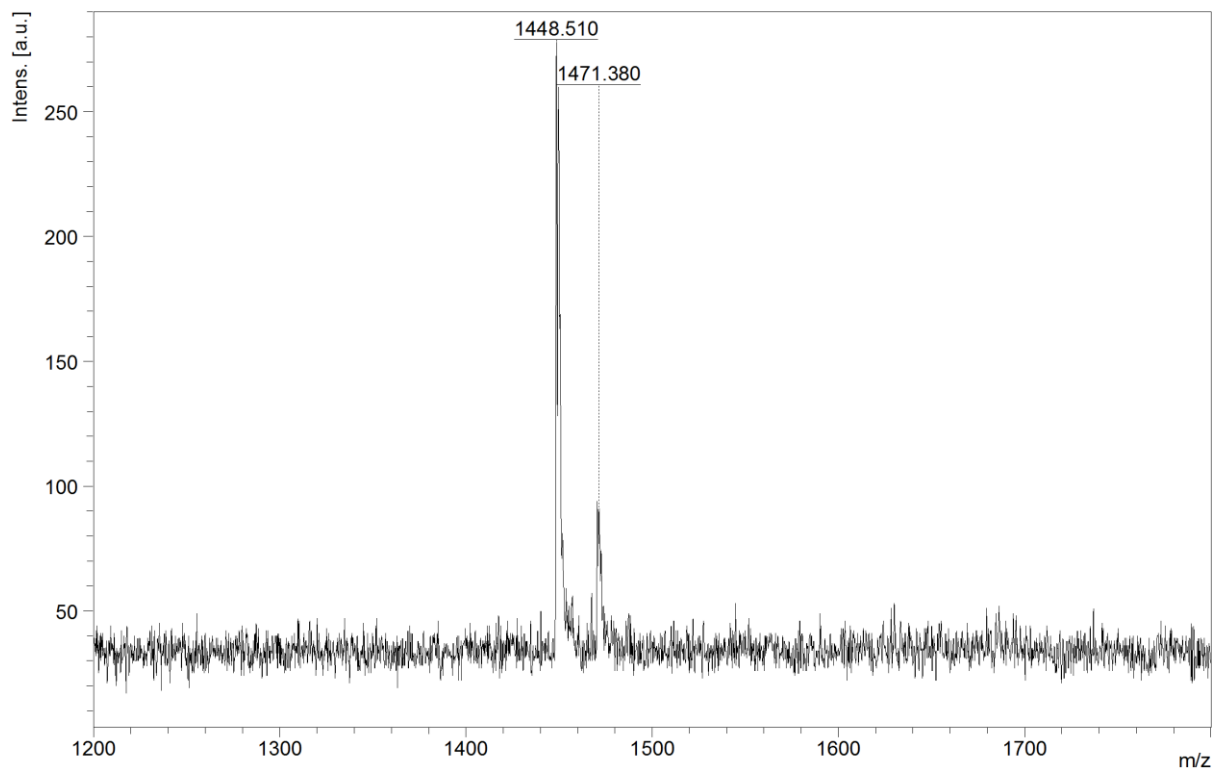

### BP212

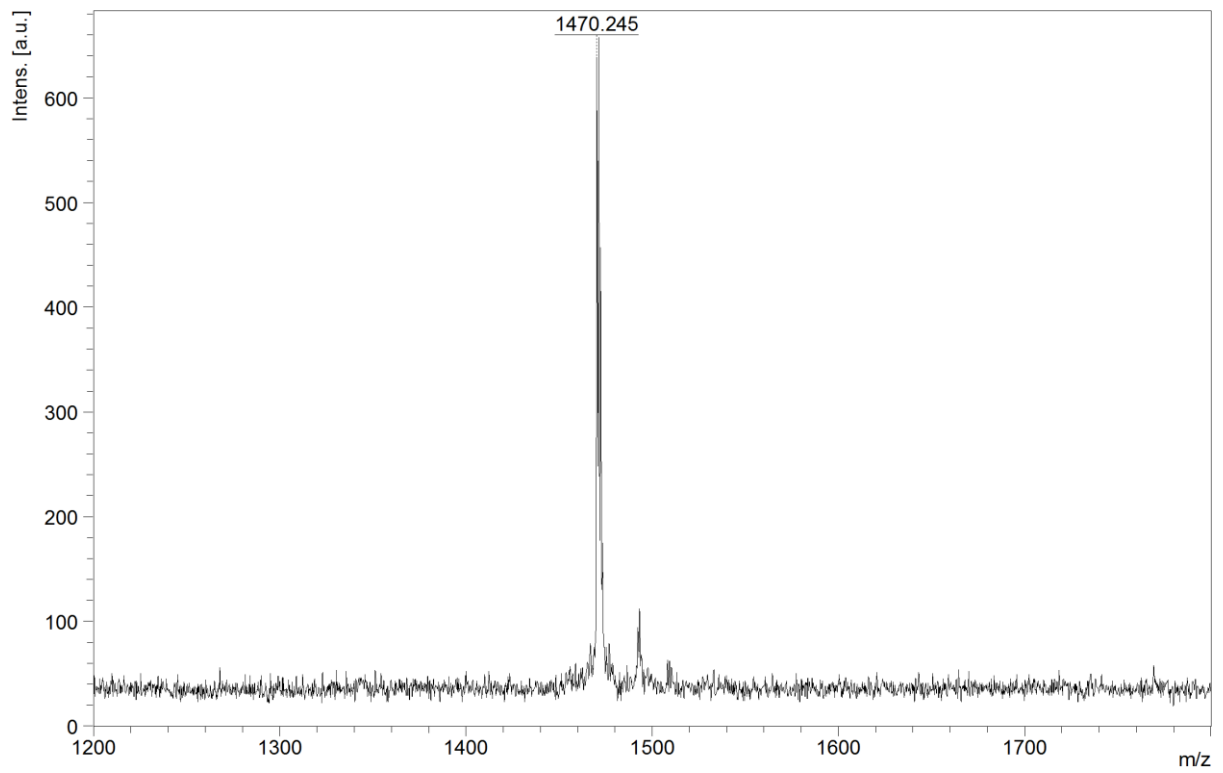

### BP213

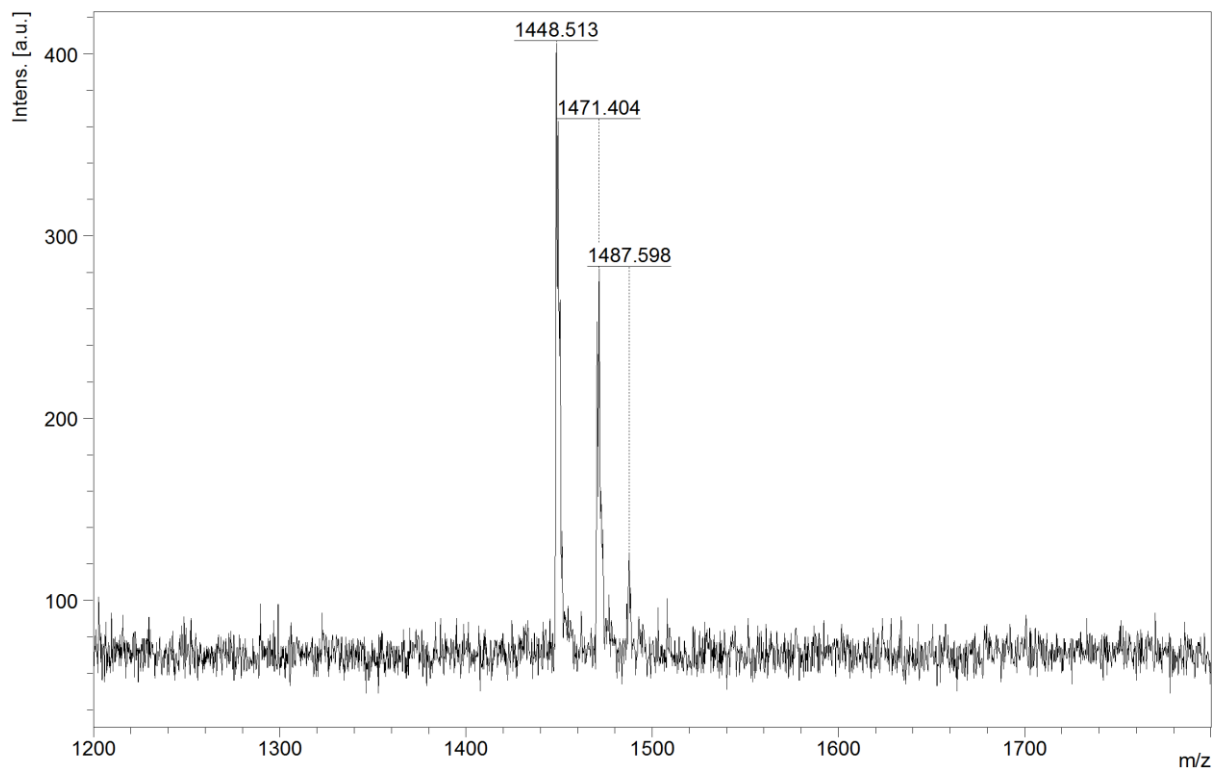

# BP214

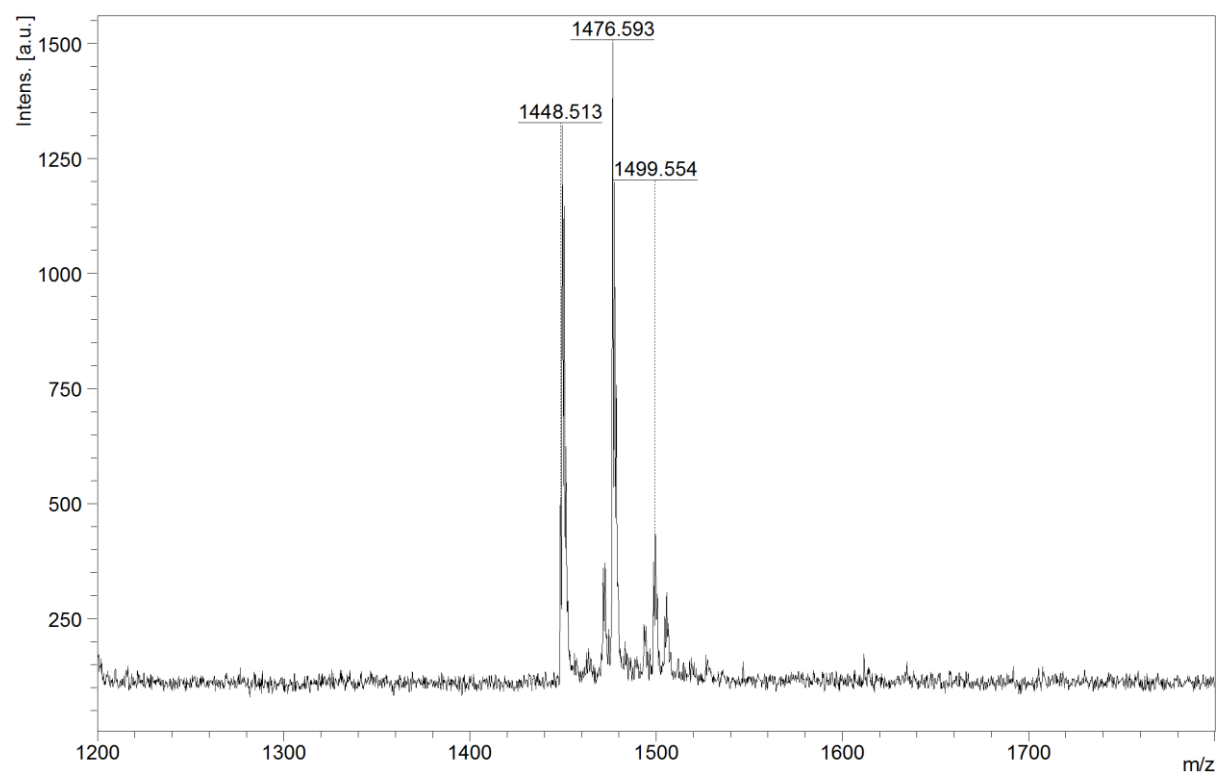

## Haemolysis Assays

The hemolytic process took place in a V-shaped polypropylene 96-well plate (NUNC Cat# 249946). Each plate accommodated 4 peptides to be tested in triplicate.

### Preparation

**Melittin precoating.** The night before the test, 150  $\mu$ l of melittin 5  $\mu$ M in water were added to the positive control wells. The day of the test, the solution was discarded and the wells were washed 3 times with the same volume of PBS. Then 75  $\mu$ l of a freshly-prepared 2.50  $\mu$ M melittin solution in PBS were transferred to the same wells.

**RBC suspension.** Freshly-drawn human whole blood (type O<sup>+</sup>, 1 ml) in EDTA was mixed gently with 3 ml of PBS and then centrifuged. The supernatant was discarded and the washing procedure was repeated twice. A 0.5 % v/v RBC suspension was prepared by mixing 40  $\mu$ l of RBC pellets with 8 ml of PBS.

**Peptides:** samples were dissolved in 500  $\mu$ l of PBS.

### Test procedure

150  $\mu$ l of peptide solution were transferred to wells A<sub>1-12</sub> as follows:

- **Peptide 1:** A<sub>1-3</sub>
- **Peptide 2:** A<sub>4-6</sub>
- **Peptide 3:** A<sub>7-9</sub>
- **Peptide 4:** A<sub>10-12</sub>

75  $\mu$ l of PBS were transferred to all the wells from B<sub>1</sub> to G<sub>12</sub>, and to H<sub>7-12</sub>. A dilution series was obtained by transferring 75  $\mu$ l from row A to row B, mixing, then transferring 75  $\mu$ l from row B to row C, etc.; 75  $\mu$ l were discarded from row G after mixing.

75  $\mu$ l of RBC suspension were added to each well and mixed with the peptide solution. The plate was covered with a Biorad Microseal film (Cat# MSF1001) and incubated at 37 °C for 1h. After such time the plate was centrifuged in order to precipitate the RBC, then 60  $\mu$ l of supernatant from each well were transferred into a clear polystyrene flat-bottomed 96-well ELISA plate (Corning Costar Cat# 3370).

Absorbance at  $\lambda = 414$  nm was determined with a Molecular Devices VersaMax spectrophotometer.

### Interpretation

Results were normalized with respect of the averaged positive (100%) and negative (0%) controls. The formula applied is:

$$\%Hemolysis = \frac{Abs(sample) - Abs(NegAvg)}{Abs(PosAvg) - Abs(sample)} * 100$$

*Abs(sample)* = absorbance of the sample;

*Abs(NegAvg)* = averaged absorbance of the negative controls;

*Abs(PosAvg)* = averaged absorbance of the positive controls.

Finally, the three results for each peptide concentration were averaged. The EC<sub>50</sub> was determined by plotting peptide concentration against hemolysis percentage and then reading the interception of the curve with the y-axis value for hemolysis = 50%. A noise level of ~4% was observed; for such reason hemolysis values inferior to twice the noise level are reported as "<8%".
